# Supplementary material for: Organocatalytic atroposelective synthesis of naphthoquinone thioglycosides from aryl-naphthoquinones and thiosugars
Source: Royal Society of Chemistry journal article supplement (doi:10.1039/d3cc01705b), 2023-01-01

# Spectrum Plot Report

|                |                  |              |                       |            |                 |                   |                                 |
|----------------|------------------|--------------|-----------------------|------------|-----------------|-------------------|---------------------------------|
| Name           | WYL-230206-4-1   | Rack Pos.    |                       | Instrument | Instrument 1    | Operator          |                                 |
| Inj. Vol. (ul) | 5                | Plate Pos.   |                       | IRM Status | All ions missed |                   |                                 |
| Data File      | WYL-230206-4-1.d | Method (Acq) | CJH230203 1000-1200.m | Comment    |                 | Acq. Time (Local) | 2/6/2023 3:45:09 PM (UTC+08:00) |

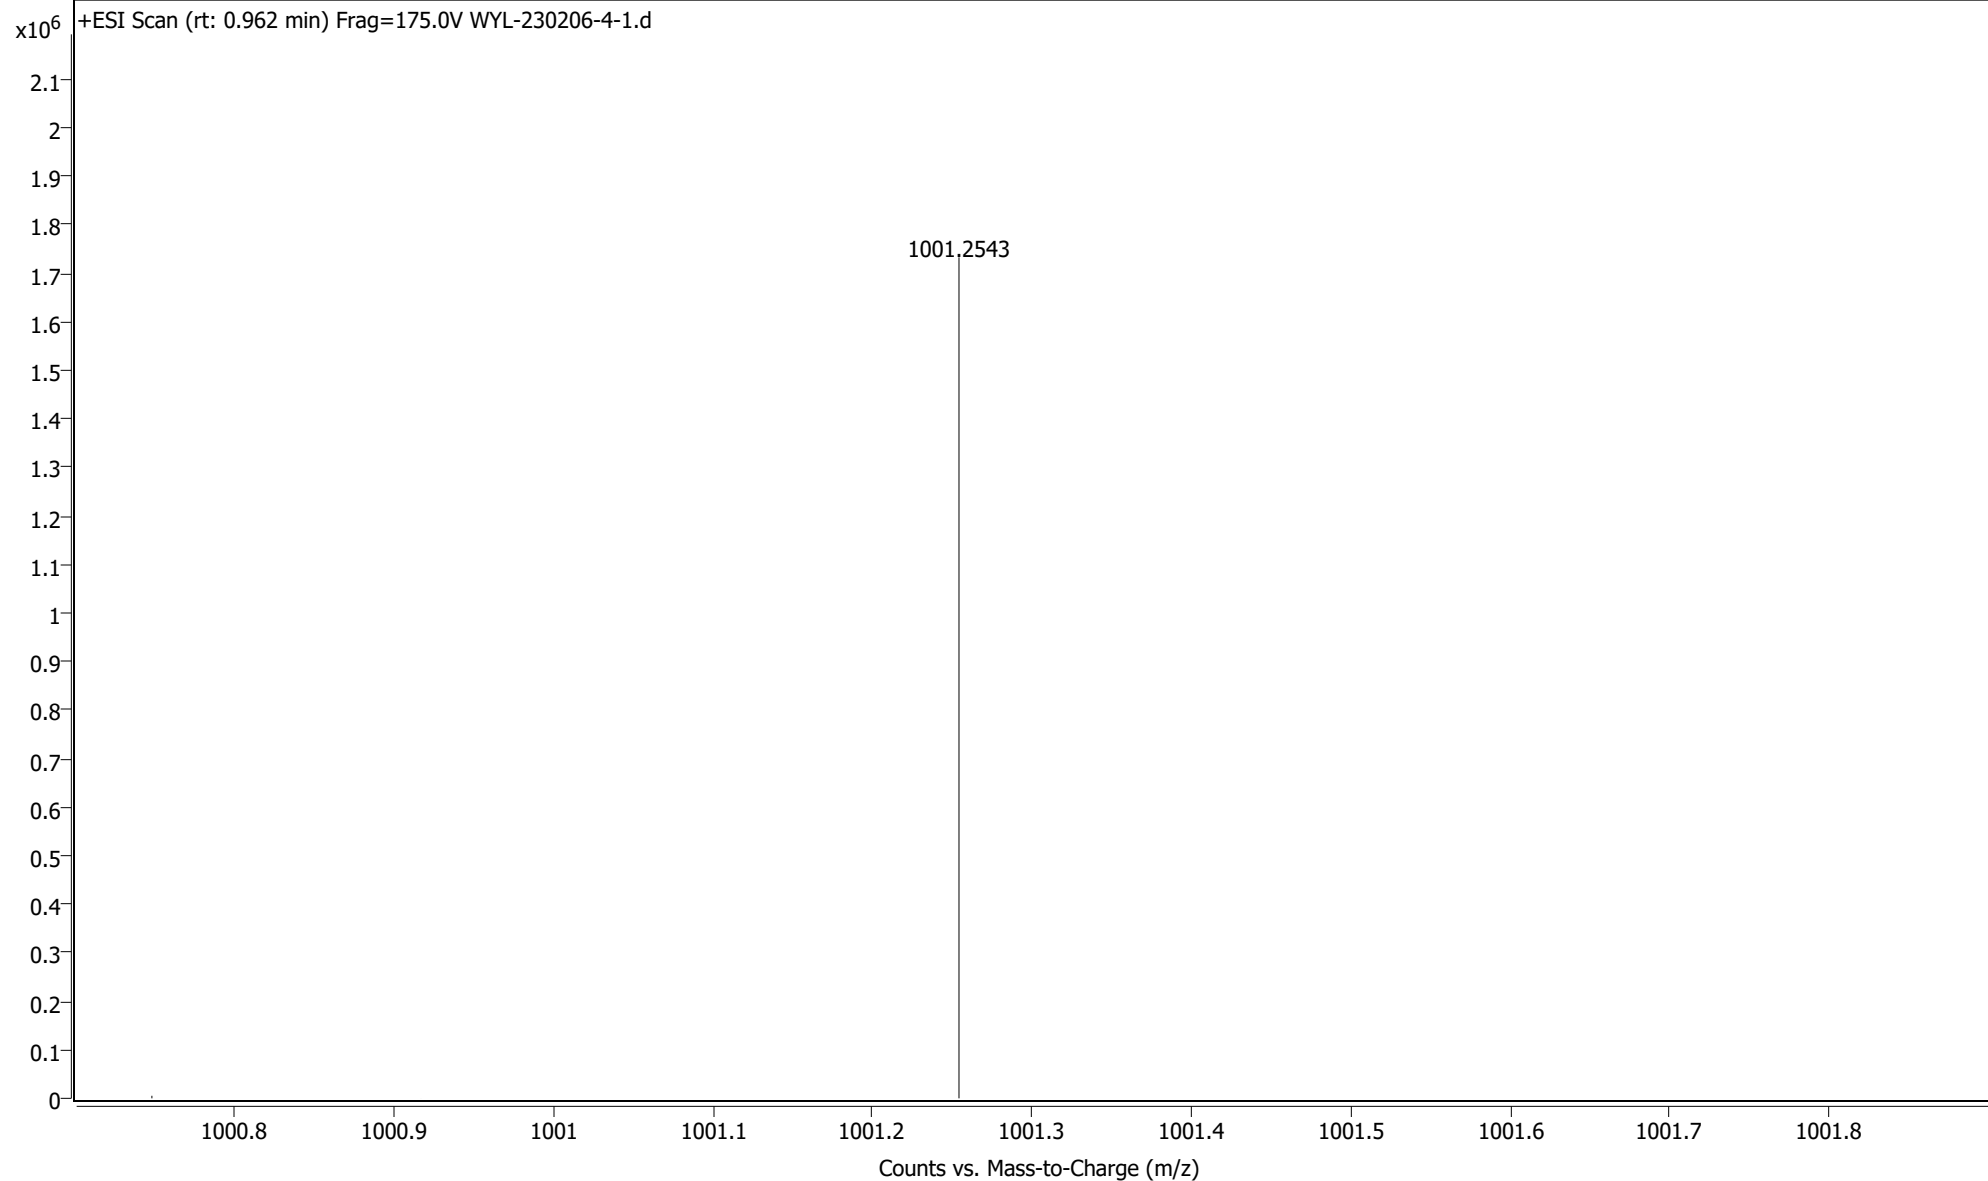

Supplement: d3cc01705b2.zip [file 3k_Graphic.pdf › MS/3k_Graphic.pdf]
