# Supplementary material for: Organocatalytic atroposelective synthesis of naphthoquinone thioglycosides from aryl-naphthoquinones and thiosugars
Source: Royal Society of Chemistry journal article supplement (doi:10.1039/d3cc01705b), 2023-01-01

# User Spectrum Plot Report

|                |                |              |                       |            |                 |                   |                                 |
|----------------|----------------|--------------|-----------------------|------------|-----------------|-------------------|---------------------------------|
| Name           | WYL-230508-2   | Rack Pos.    |                       | Instrument | Instrument 1    | Operator          |                                 |
| Inj. Vol. (ul) | 8              | Plate Pos.   |                       | IRM Status | All ions missed |                   |                                 |
| Data File      | WYL-230508-2.d | Method (Acq) | CJH 230211 100-1200.m | Comment    |                 | Acq. Time (Local) | 5/8/2023 4:46:48 PM (UTC+08:00) |

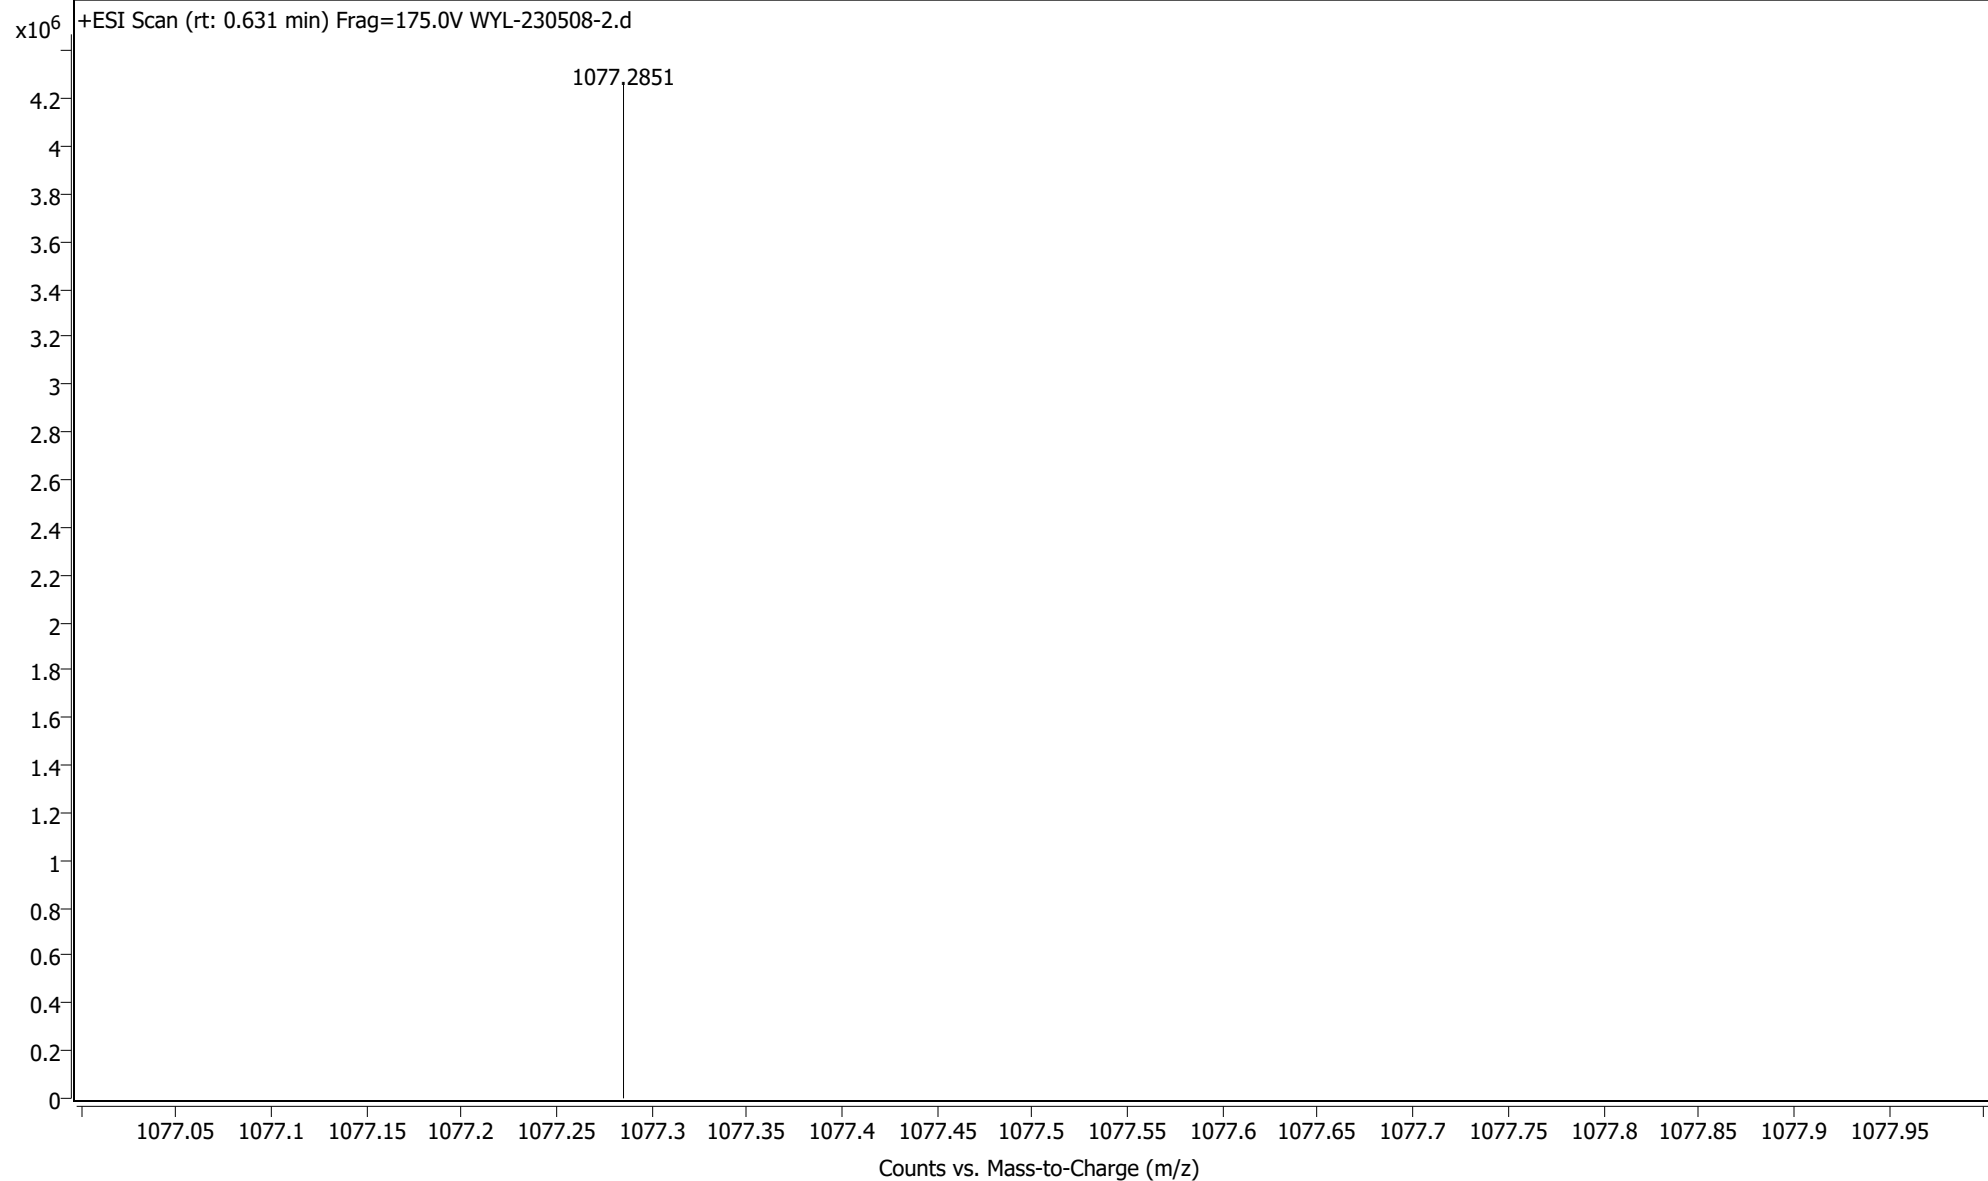

Supplement: d3cc01705b2.zip [file 3p_Graphic.pdf › MS/3p_Graphic.pdf]
