# Supplementary figures and images for: Organocatalytic atroposelective synthesis of naphthoquinone thioglycosides from aryl-naphthoquinones and thiosugars
Source: Royal Society of Chemistry journal article supplement (doi:10.1039/d3cc01705b), 2023-01-01

# User Spectrum Plot Report

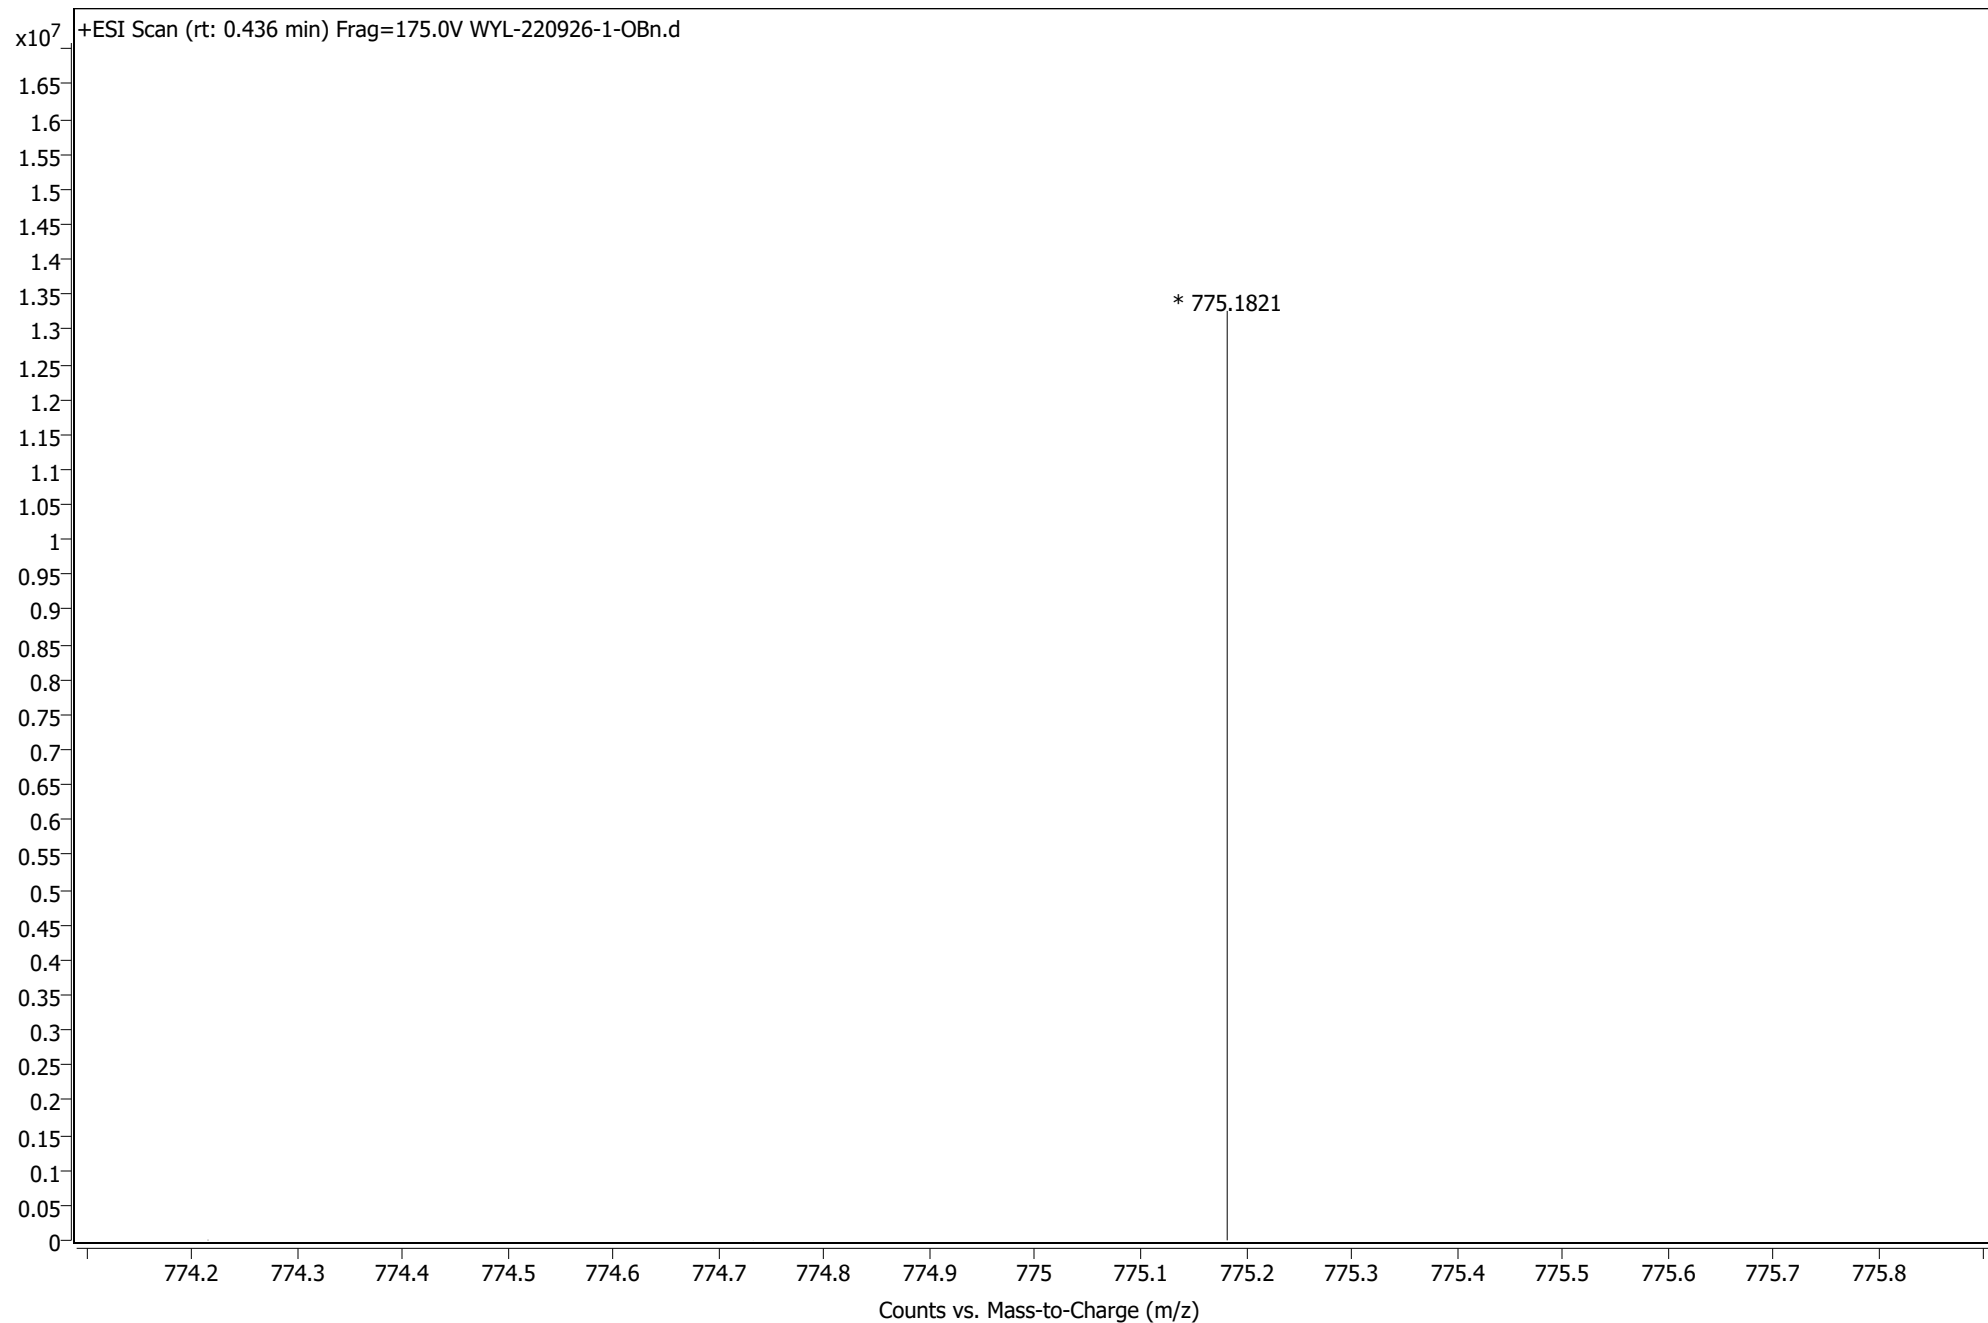

Supplement: d3cc01705b2.zip [file 3a_Graphic.pdf › MS/3a_Graphic.pdf]

# User Spectrum Plot Report

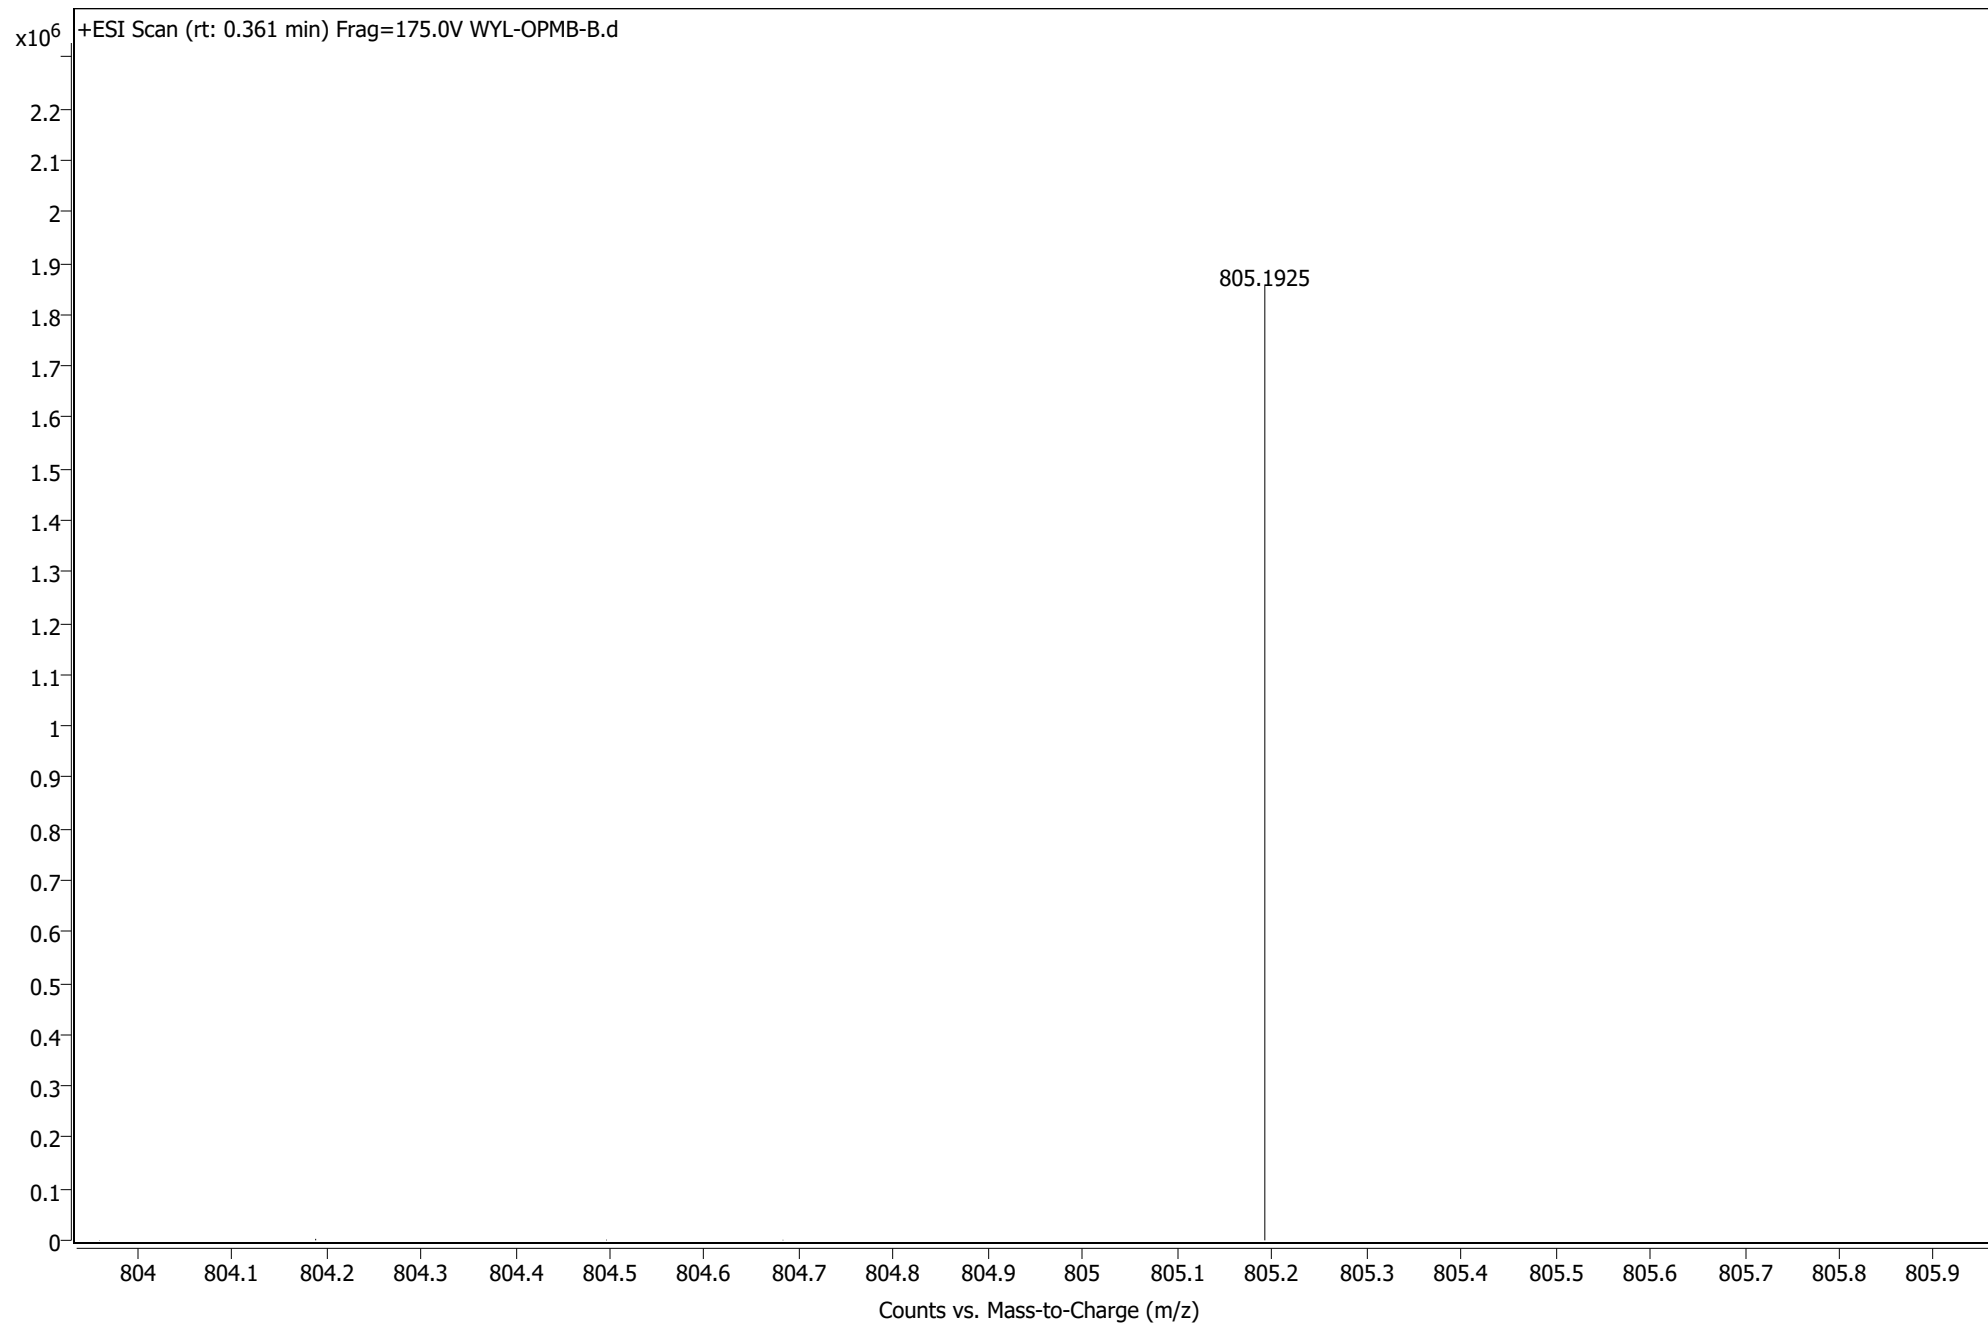

Supplement: d3cc01705b2.zip [file 3b-Graphic.pdf › MS/3b-Graphic.pdf]

# User Spectrum Plot Report

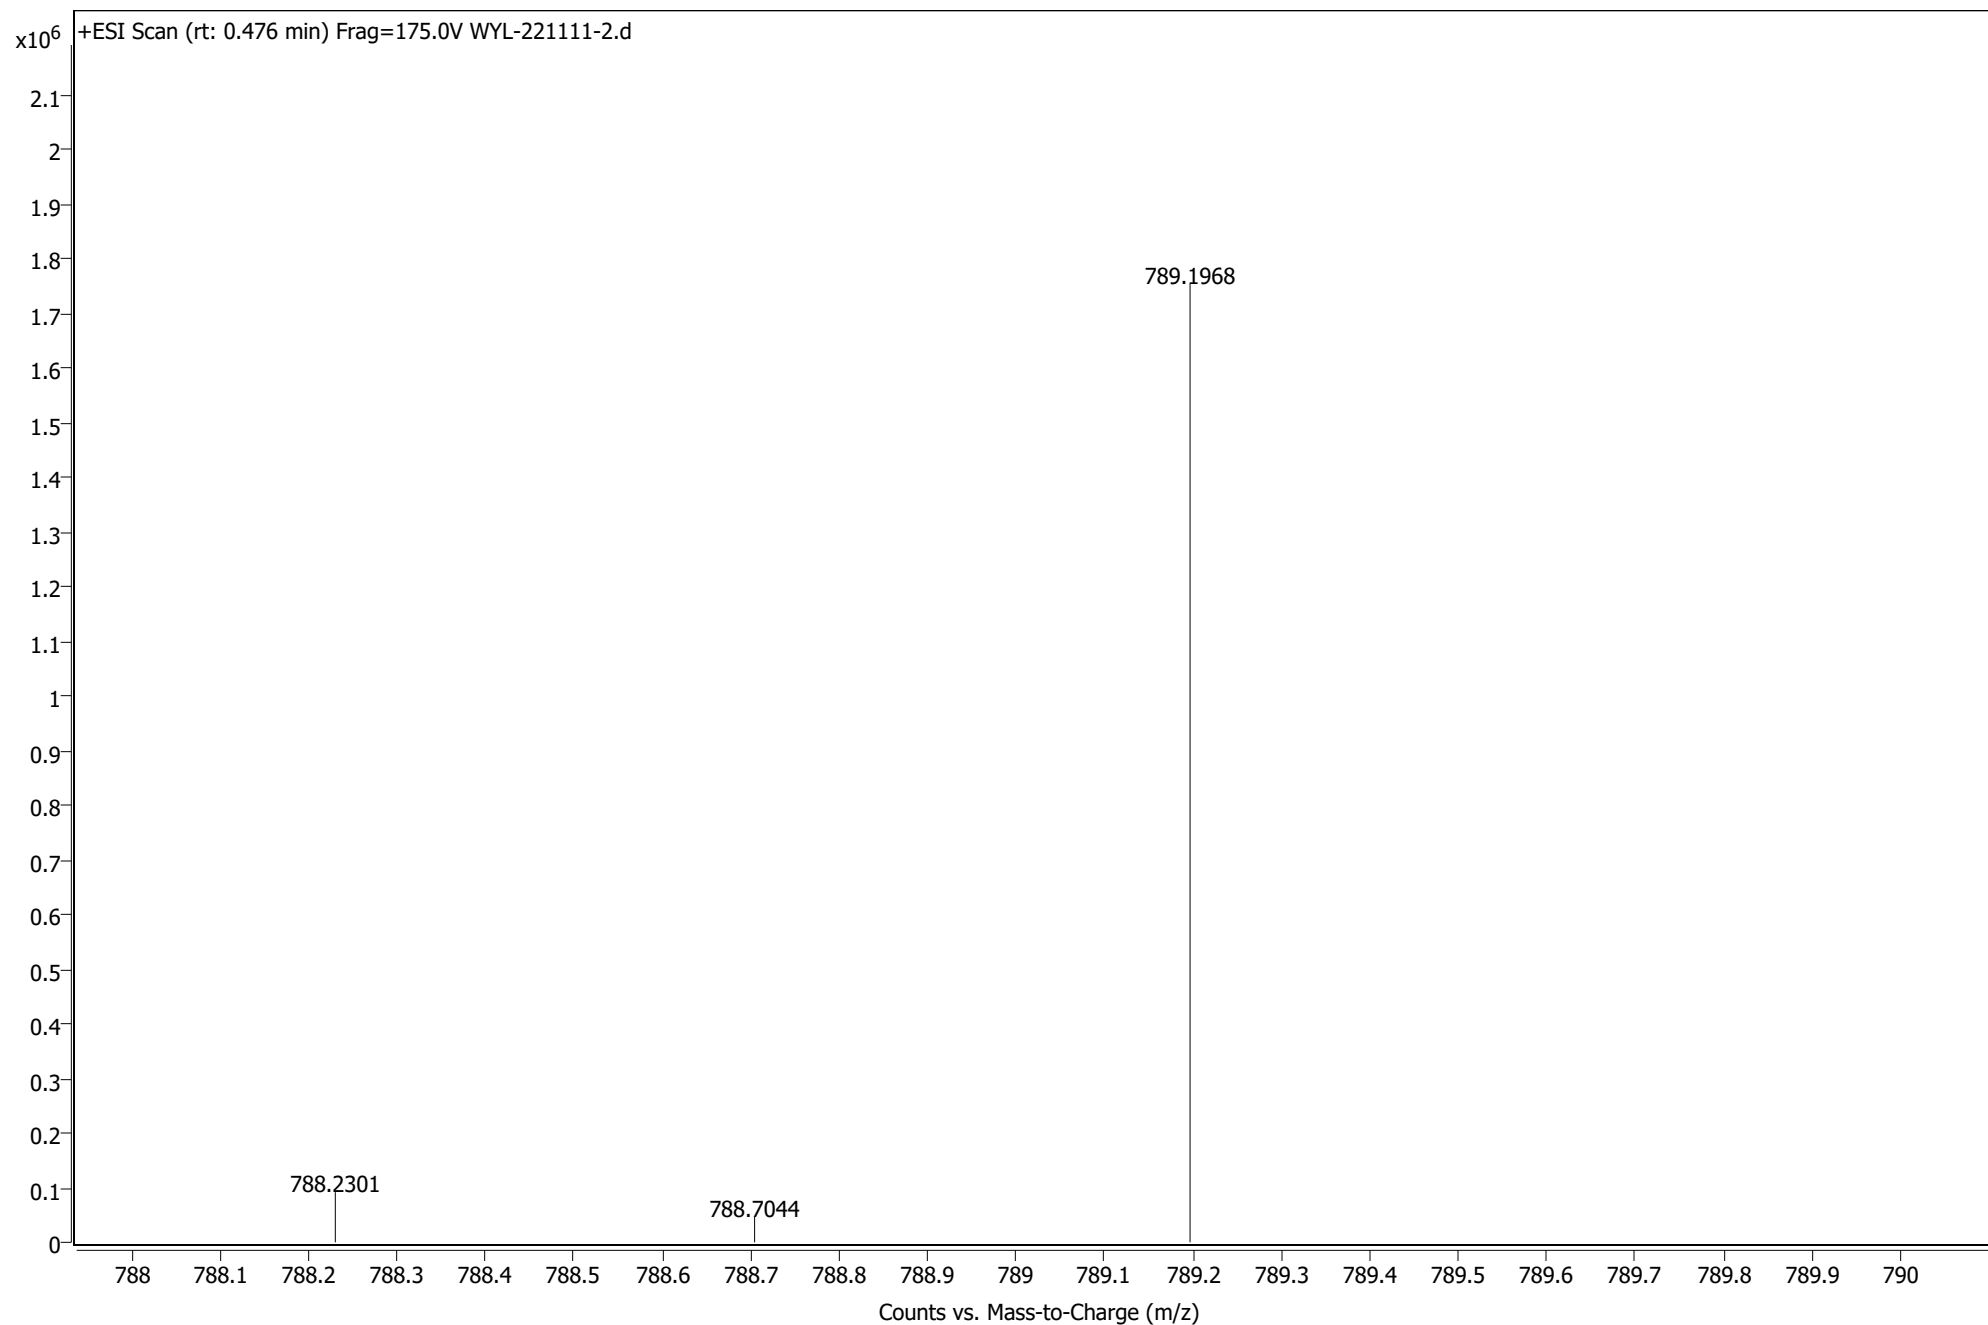

Supplement: d3cc01705b2.zip [file 3c-Graphic.pdf › MS/3c-Graphic.pdf]

# User Spectrum Plot Report

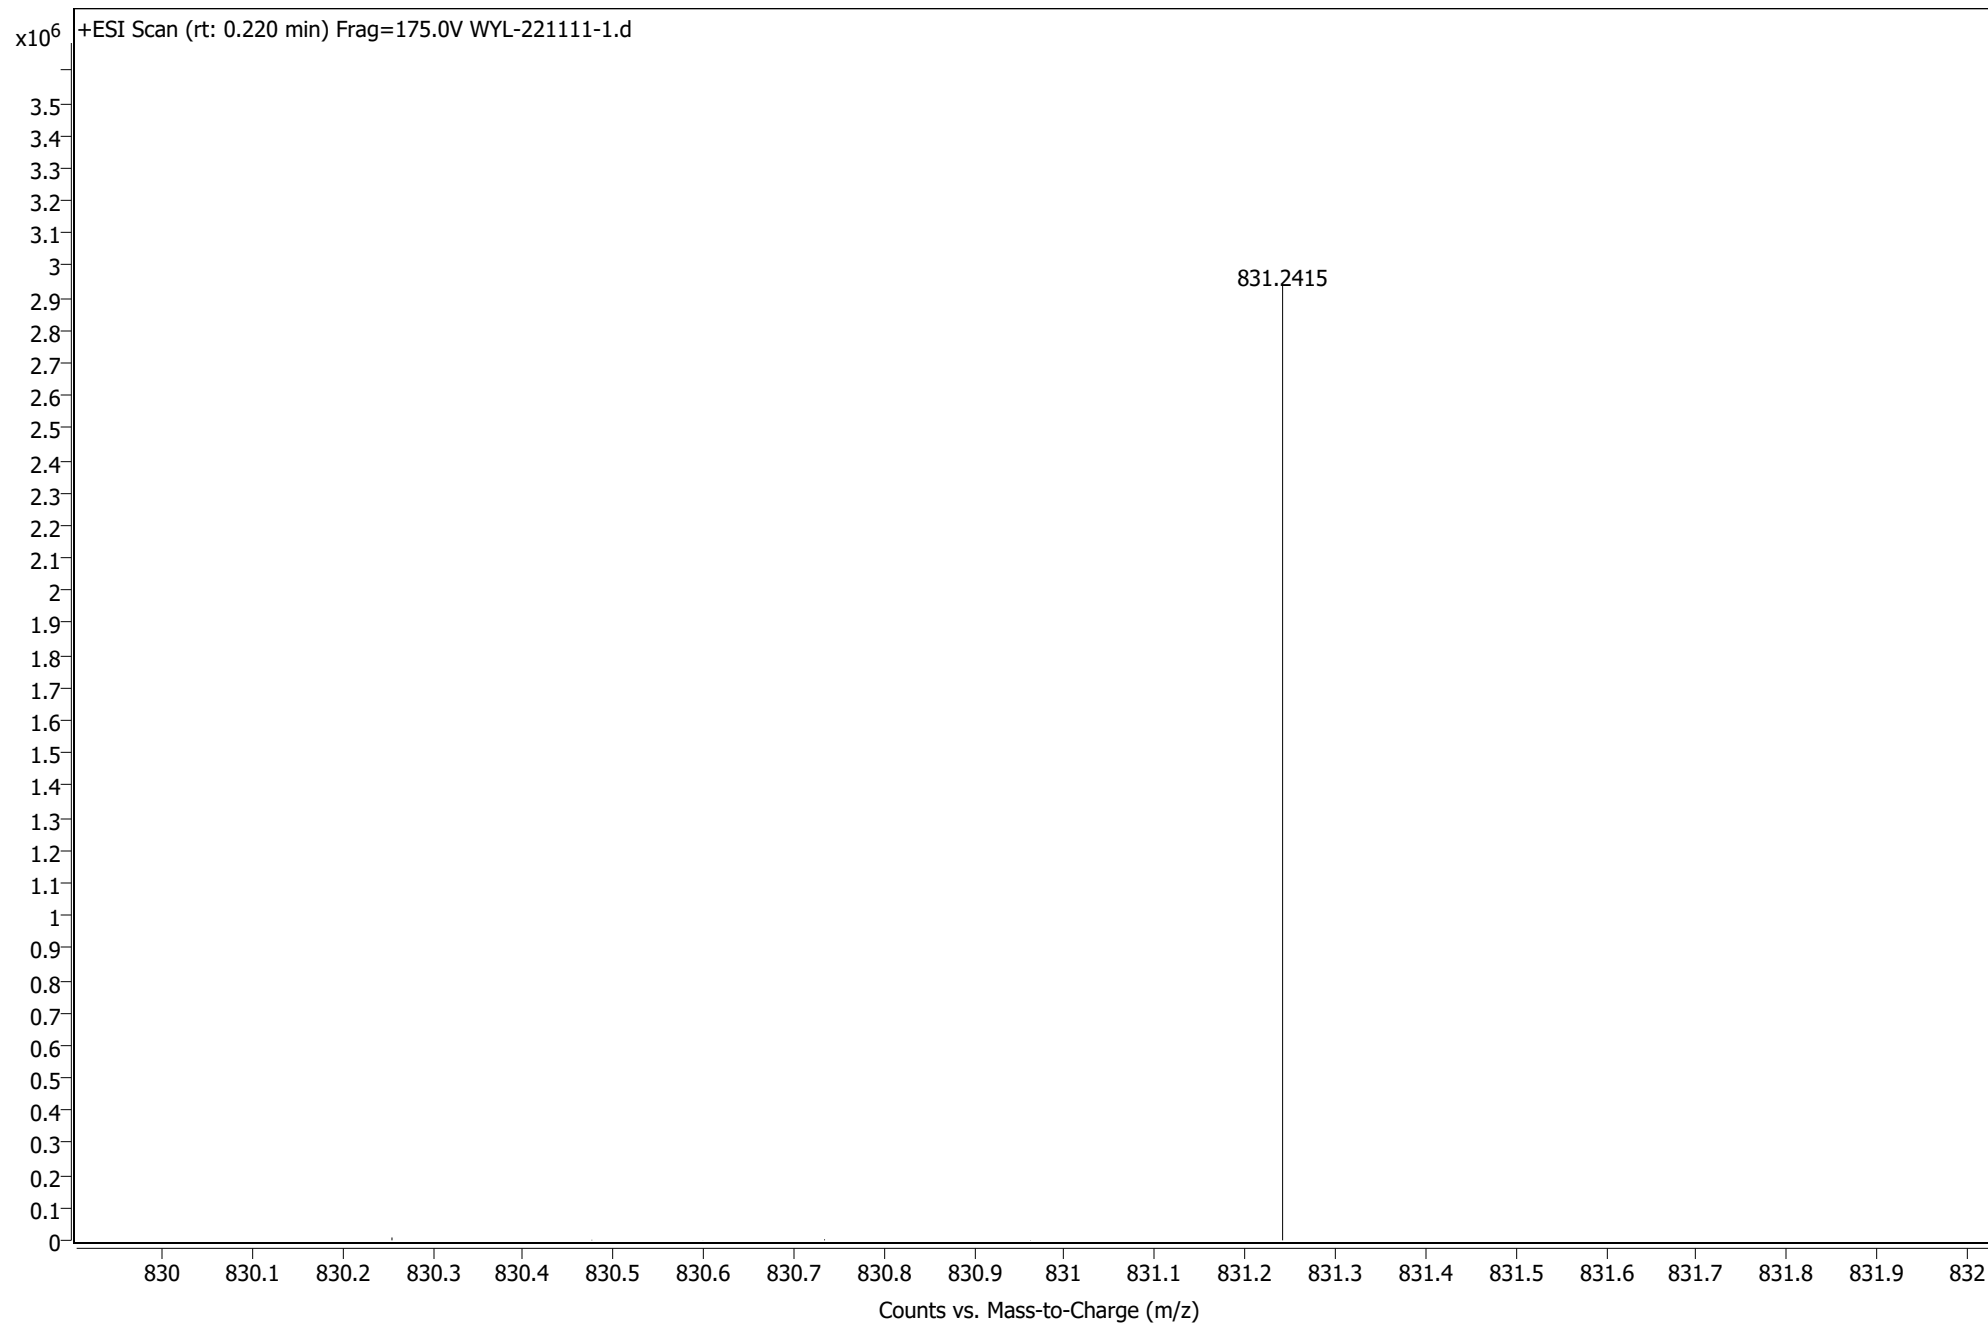

Supplement: d3cc01705b2.zip [file 3d_Graphic.pdf › MS/3d_Graphic.pdf]

# User Spectrum Plot Report

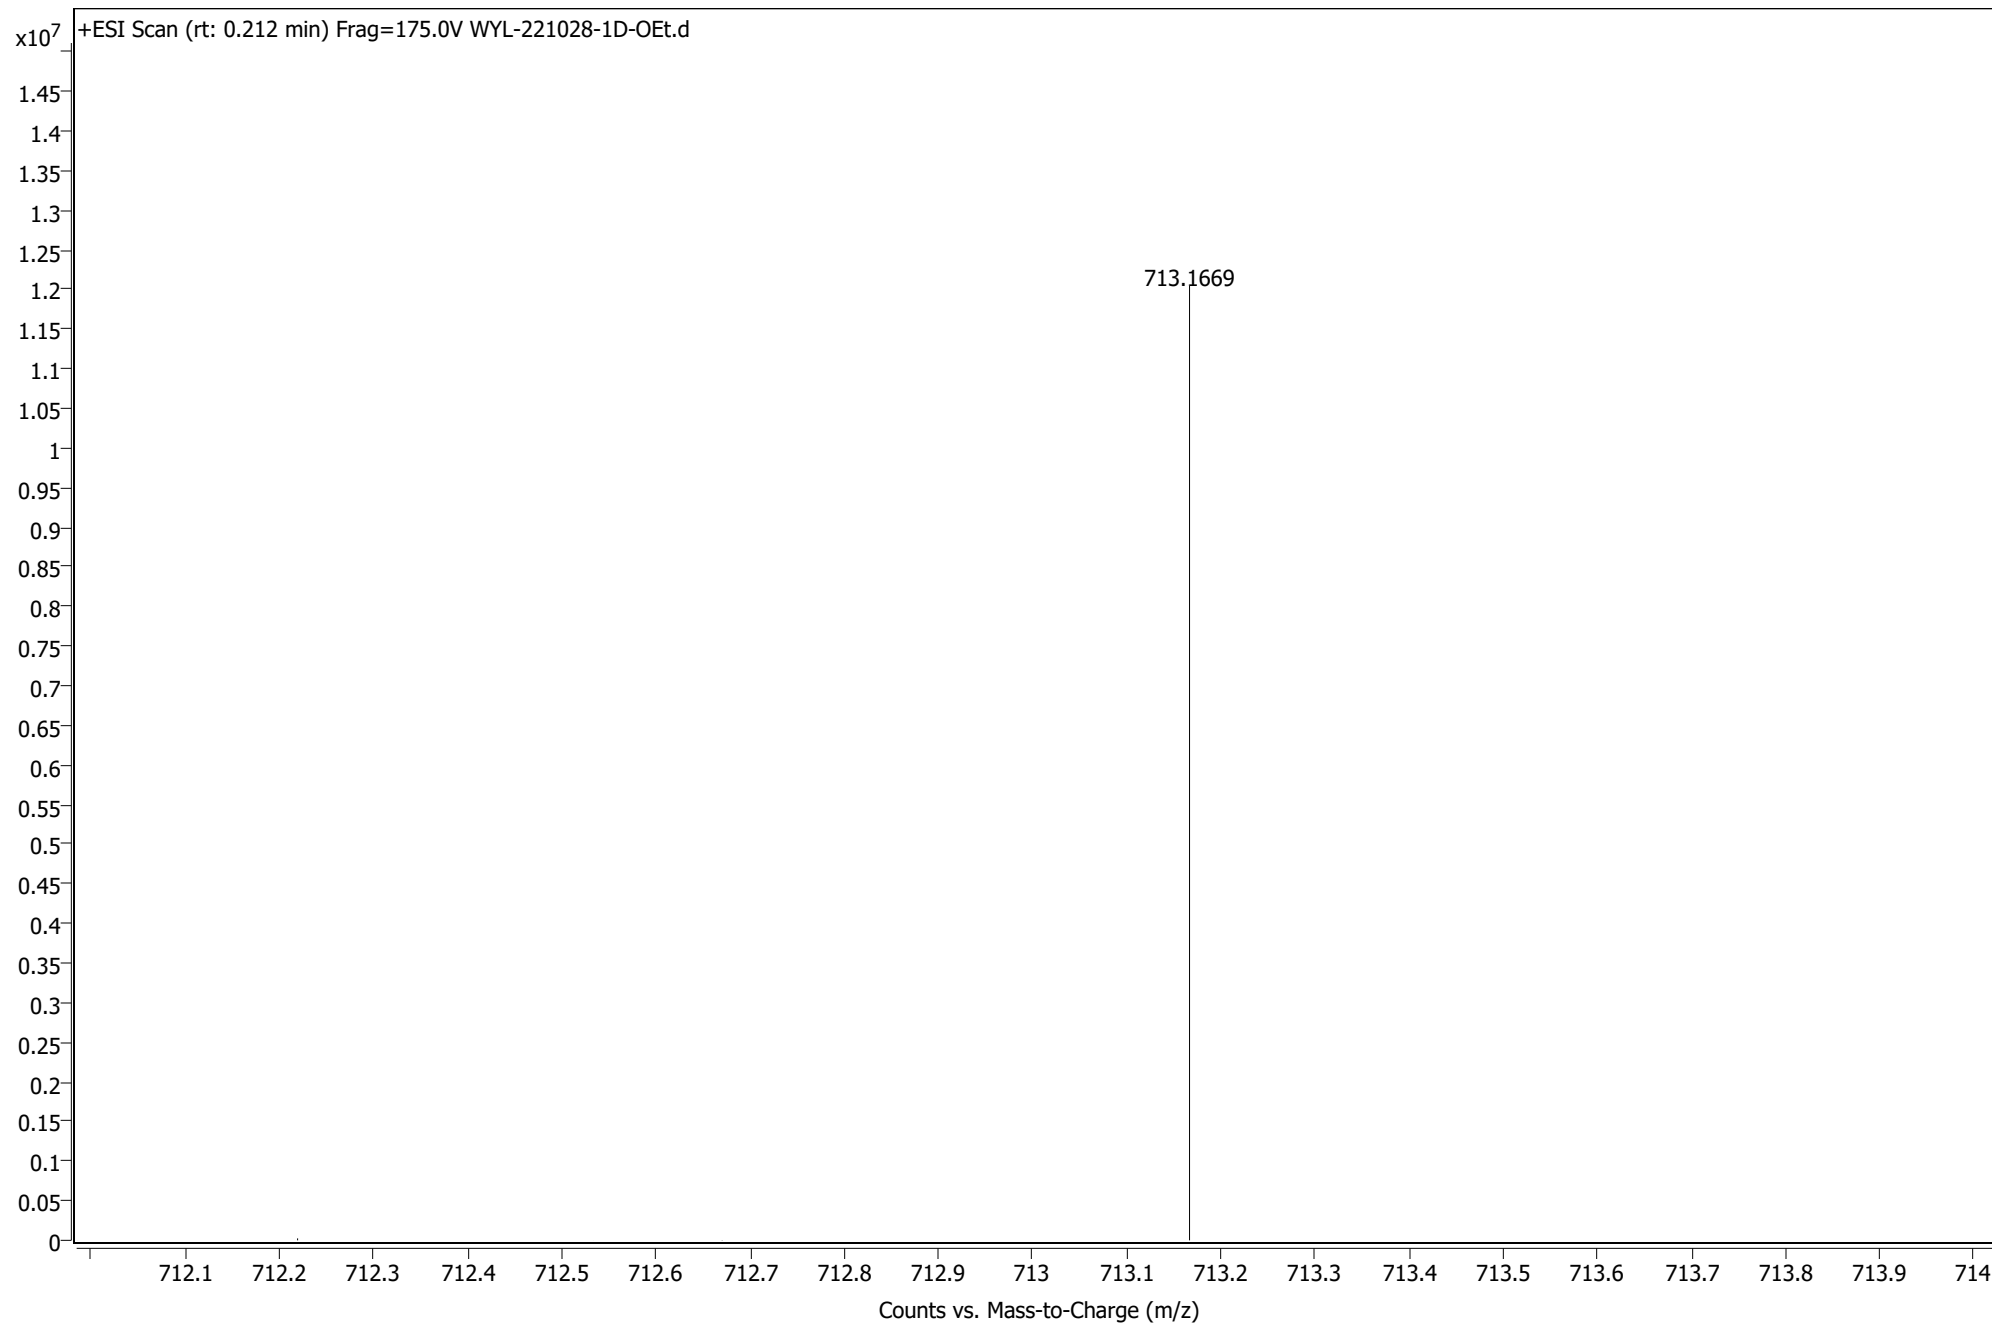

Supplement: d3cc01705b2.zip [file 3e_Graphic.pdf › MS/3e_Graphic.pdf]

# User Spectrum Plot Report

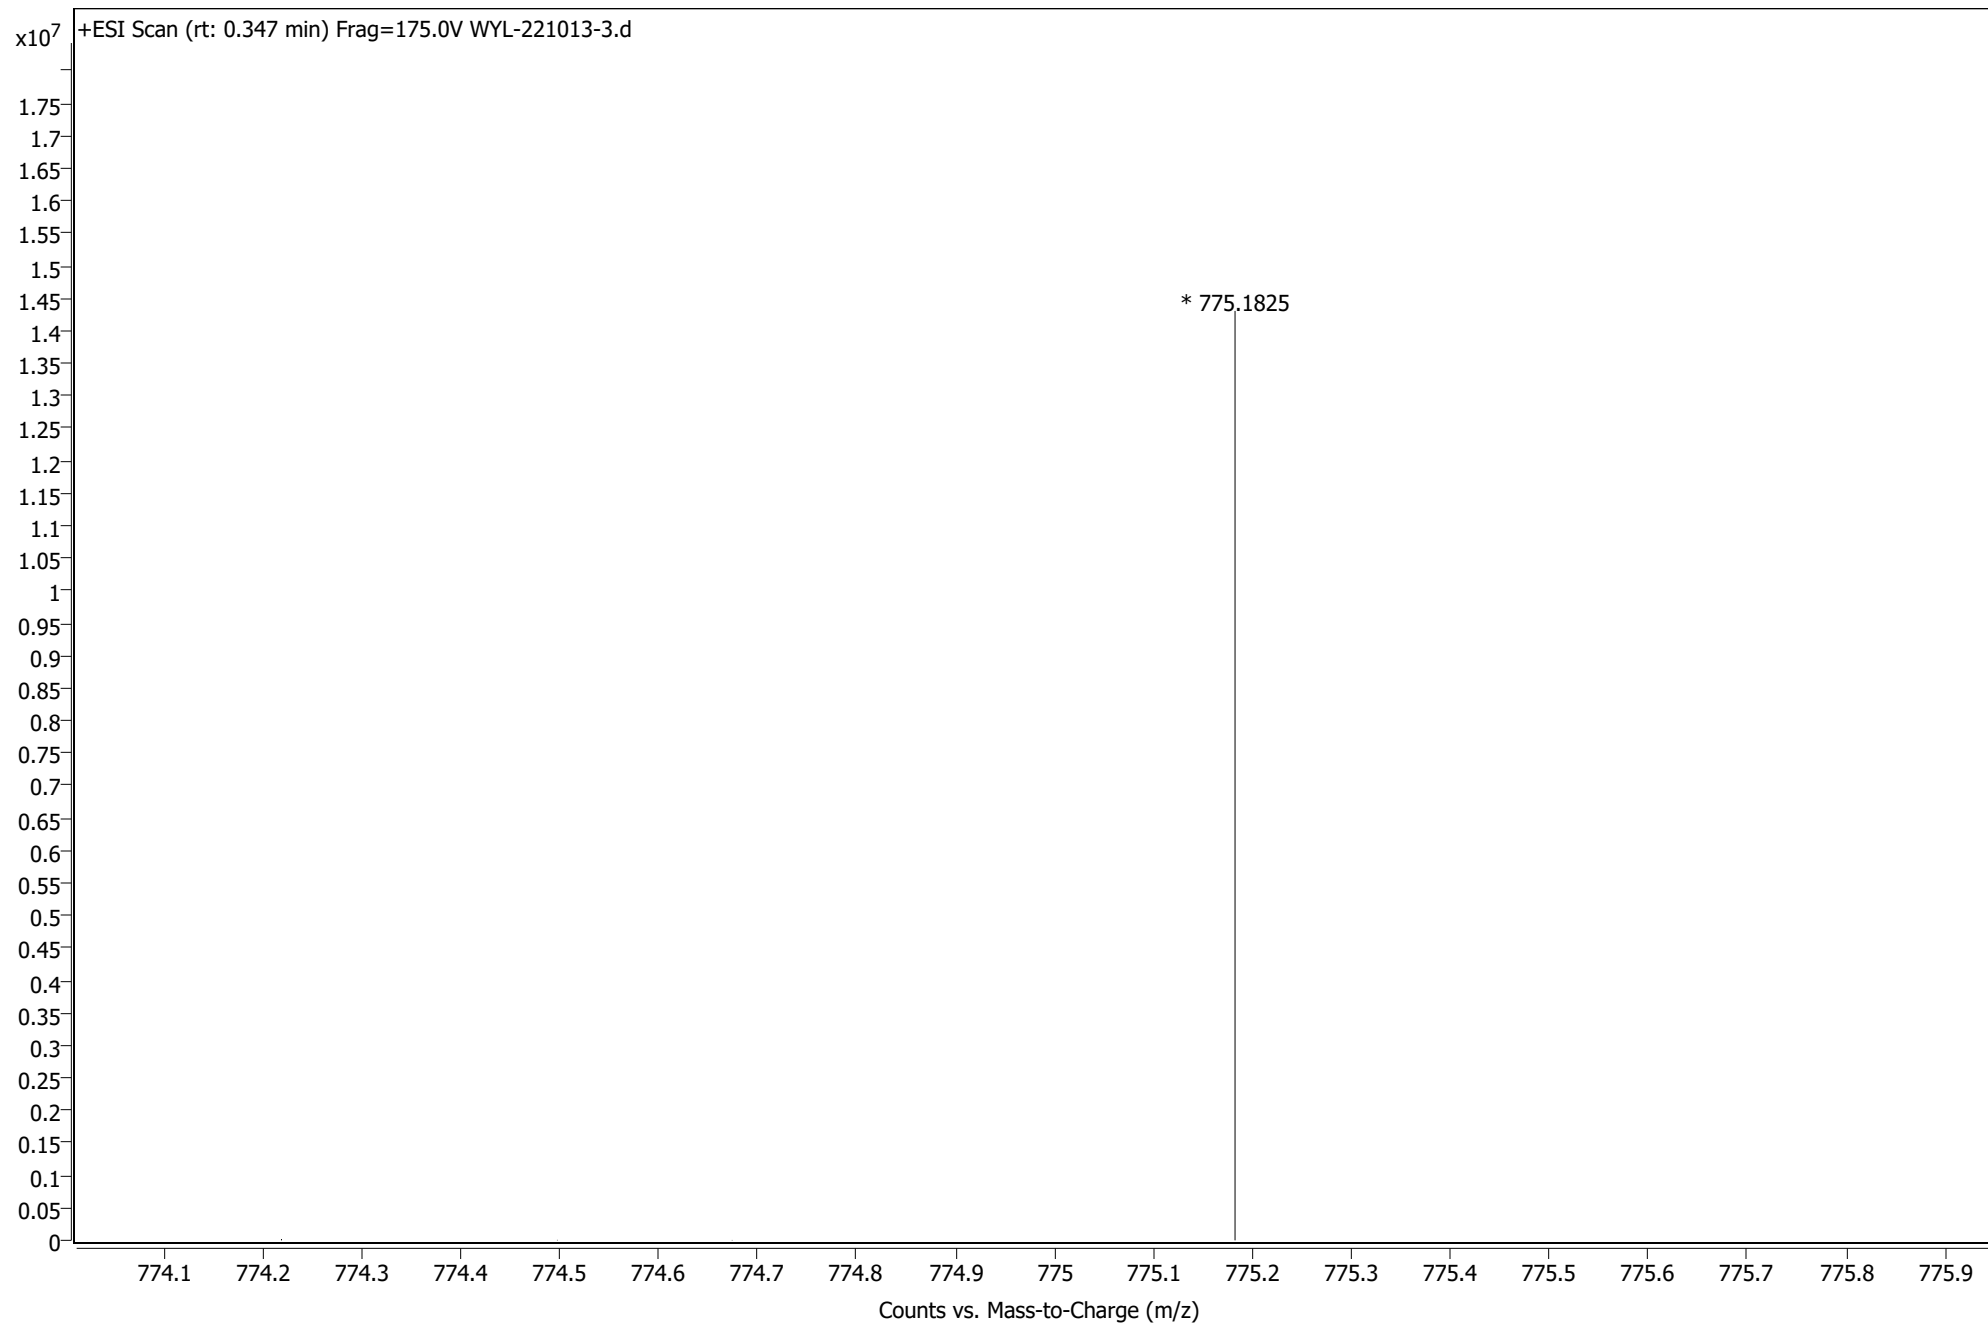

Supplement: d3cc01705b2.zip [file 3f_Graphic.pdf › MS/3f_Graphic.pdf]

# User Spectrum Plot Report

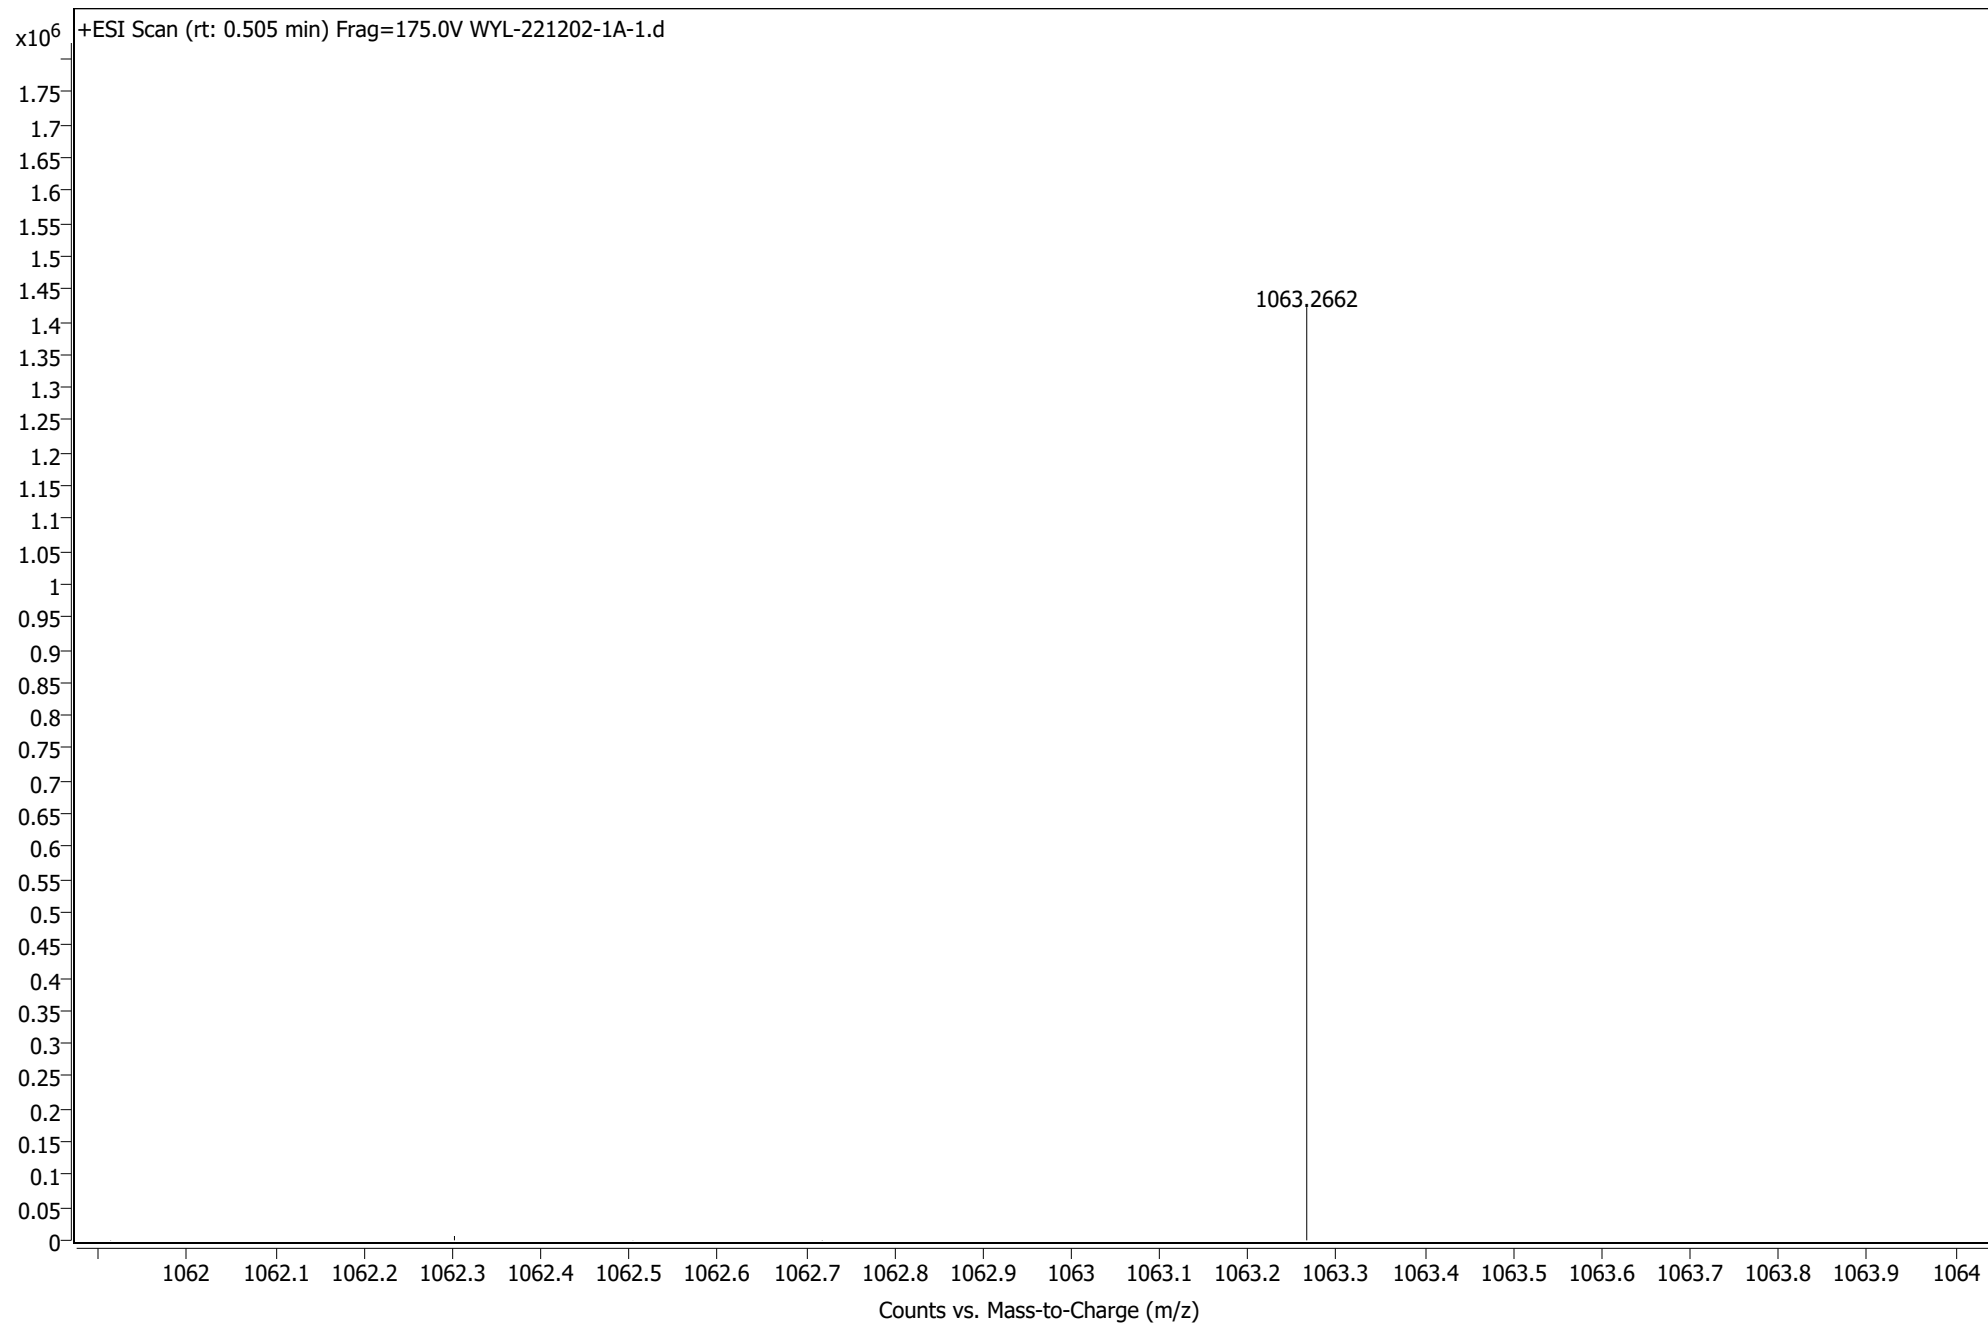

Supplement: d3cc01705b2.zip [file 3g_Graphic.pdf › MS/3g_Graphic.pdf]

# User Spectrum Plot Report

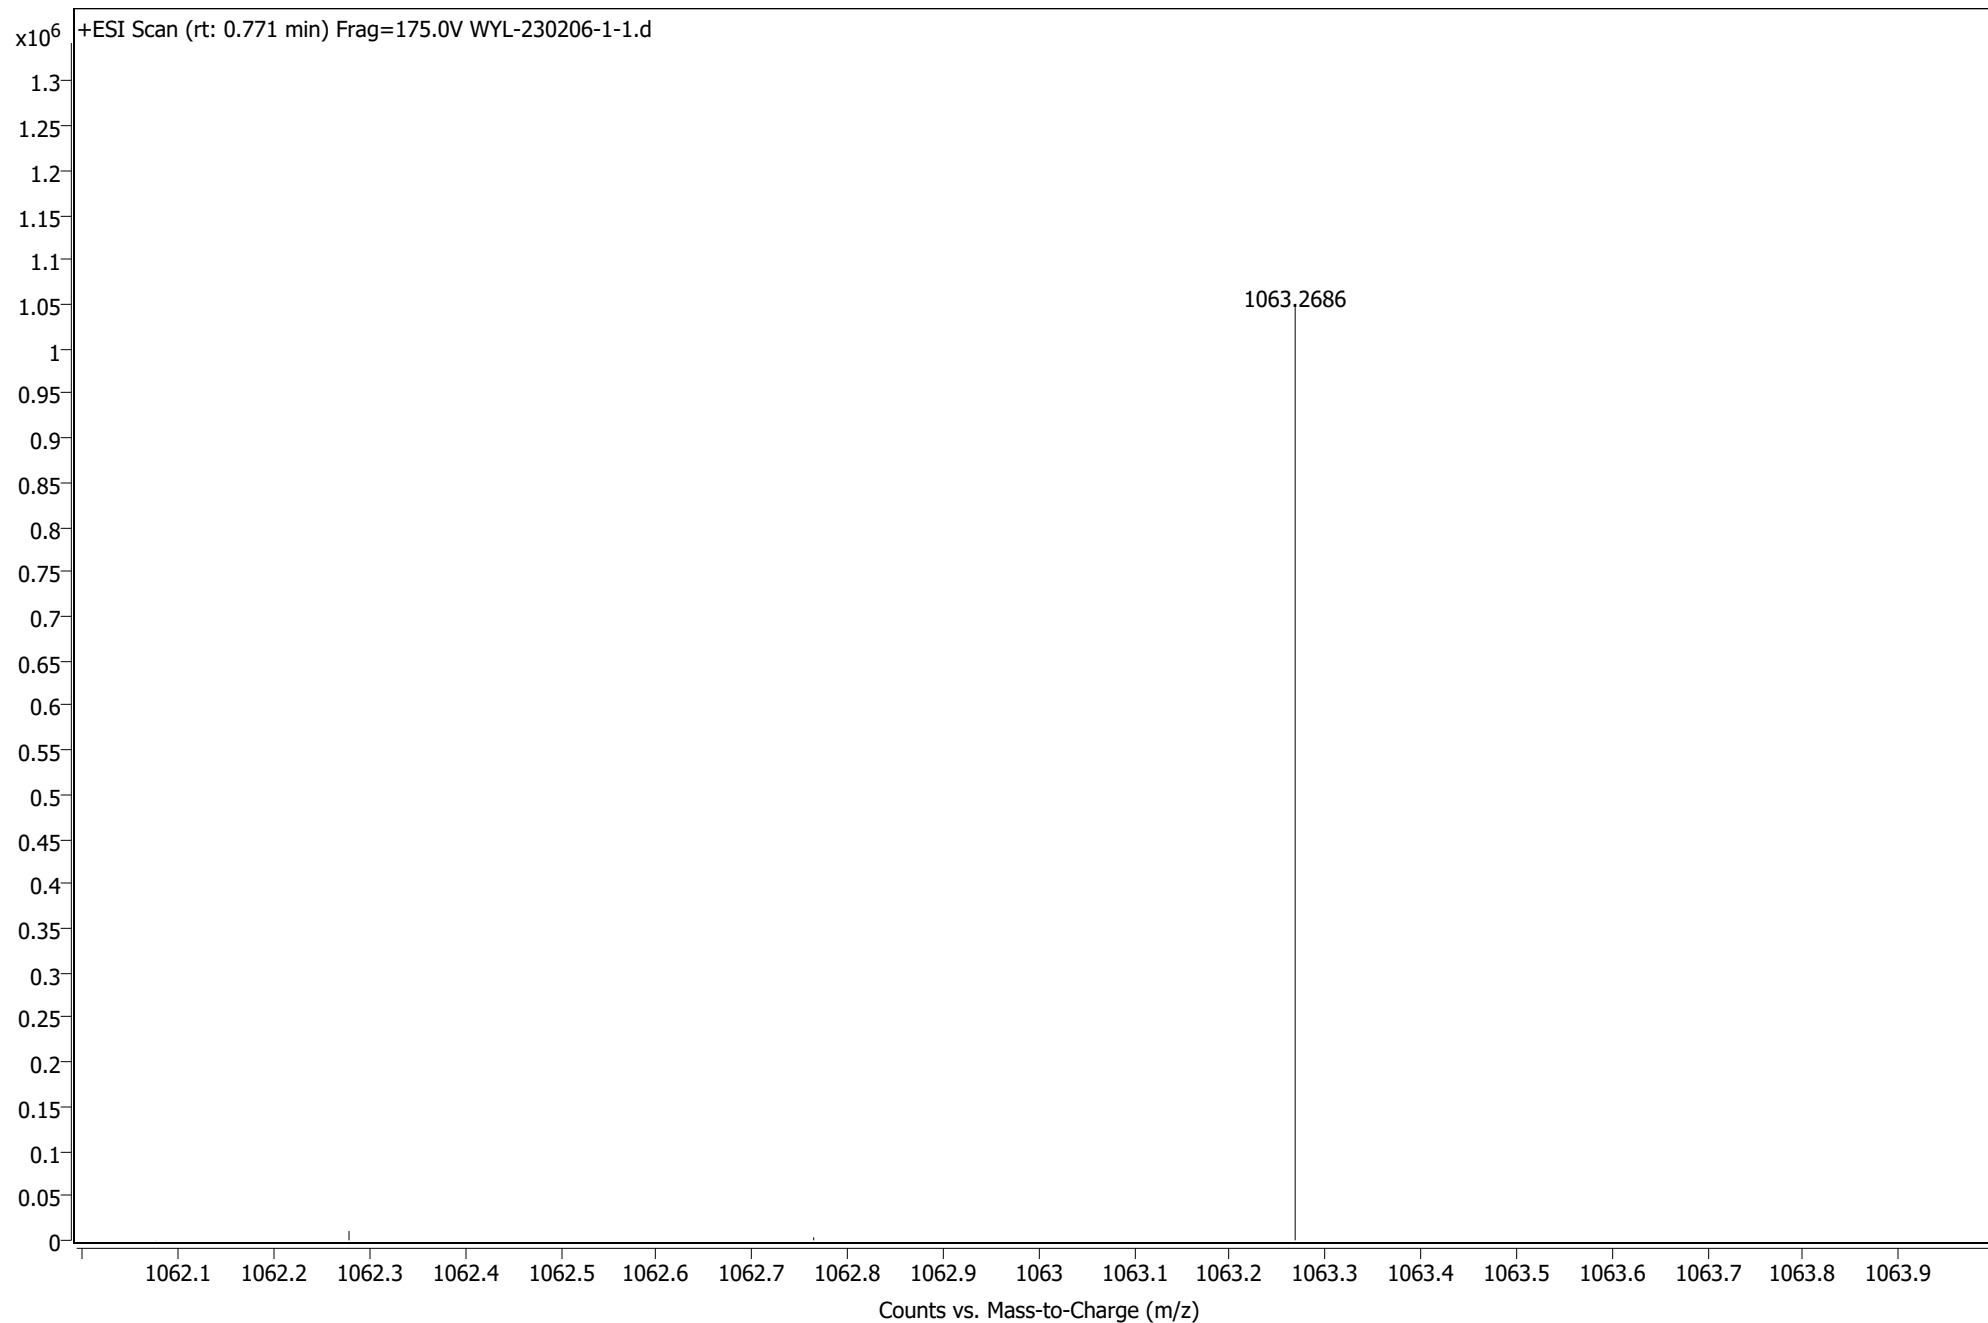

Supplement: d3cc01705b2.zip [file 3h_Graphic.pdf › MS/3h_Graphic.pdf]

# User Spectrum Plot Report

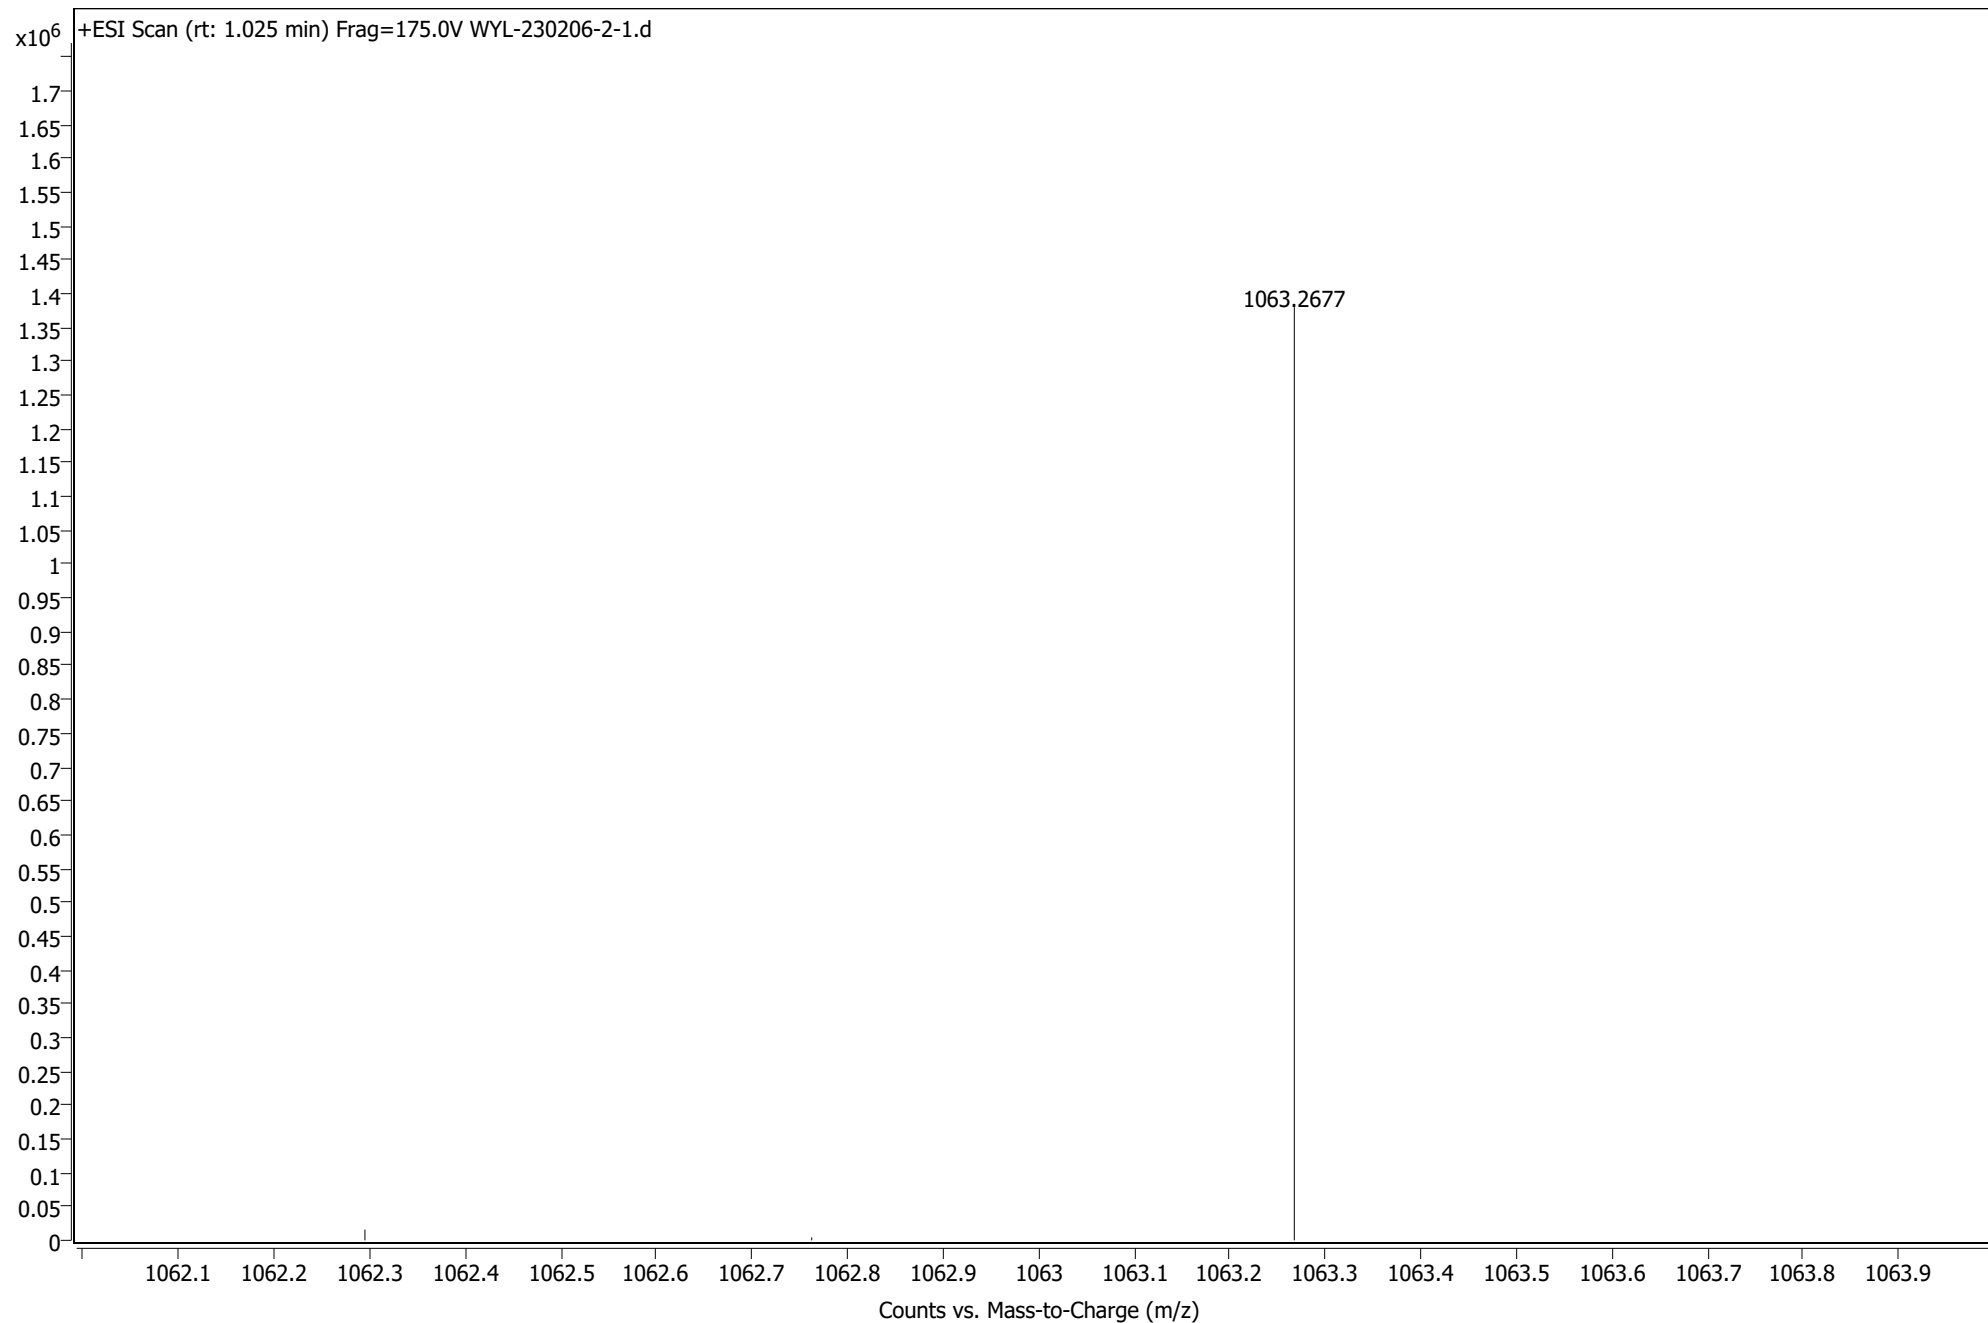

Supplement: d3cc01705b2.zip [file 3i_Graphic.pdf › MS/3i_Graphic.pdf]

# User Spectrum Plot Report

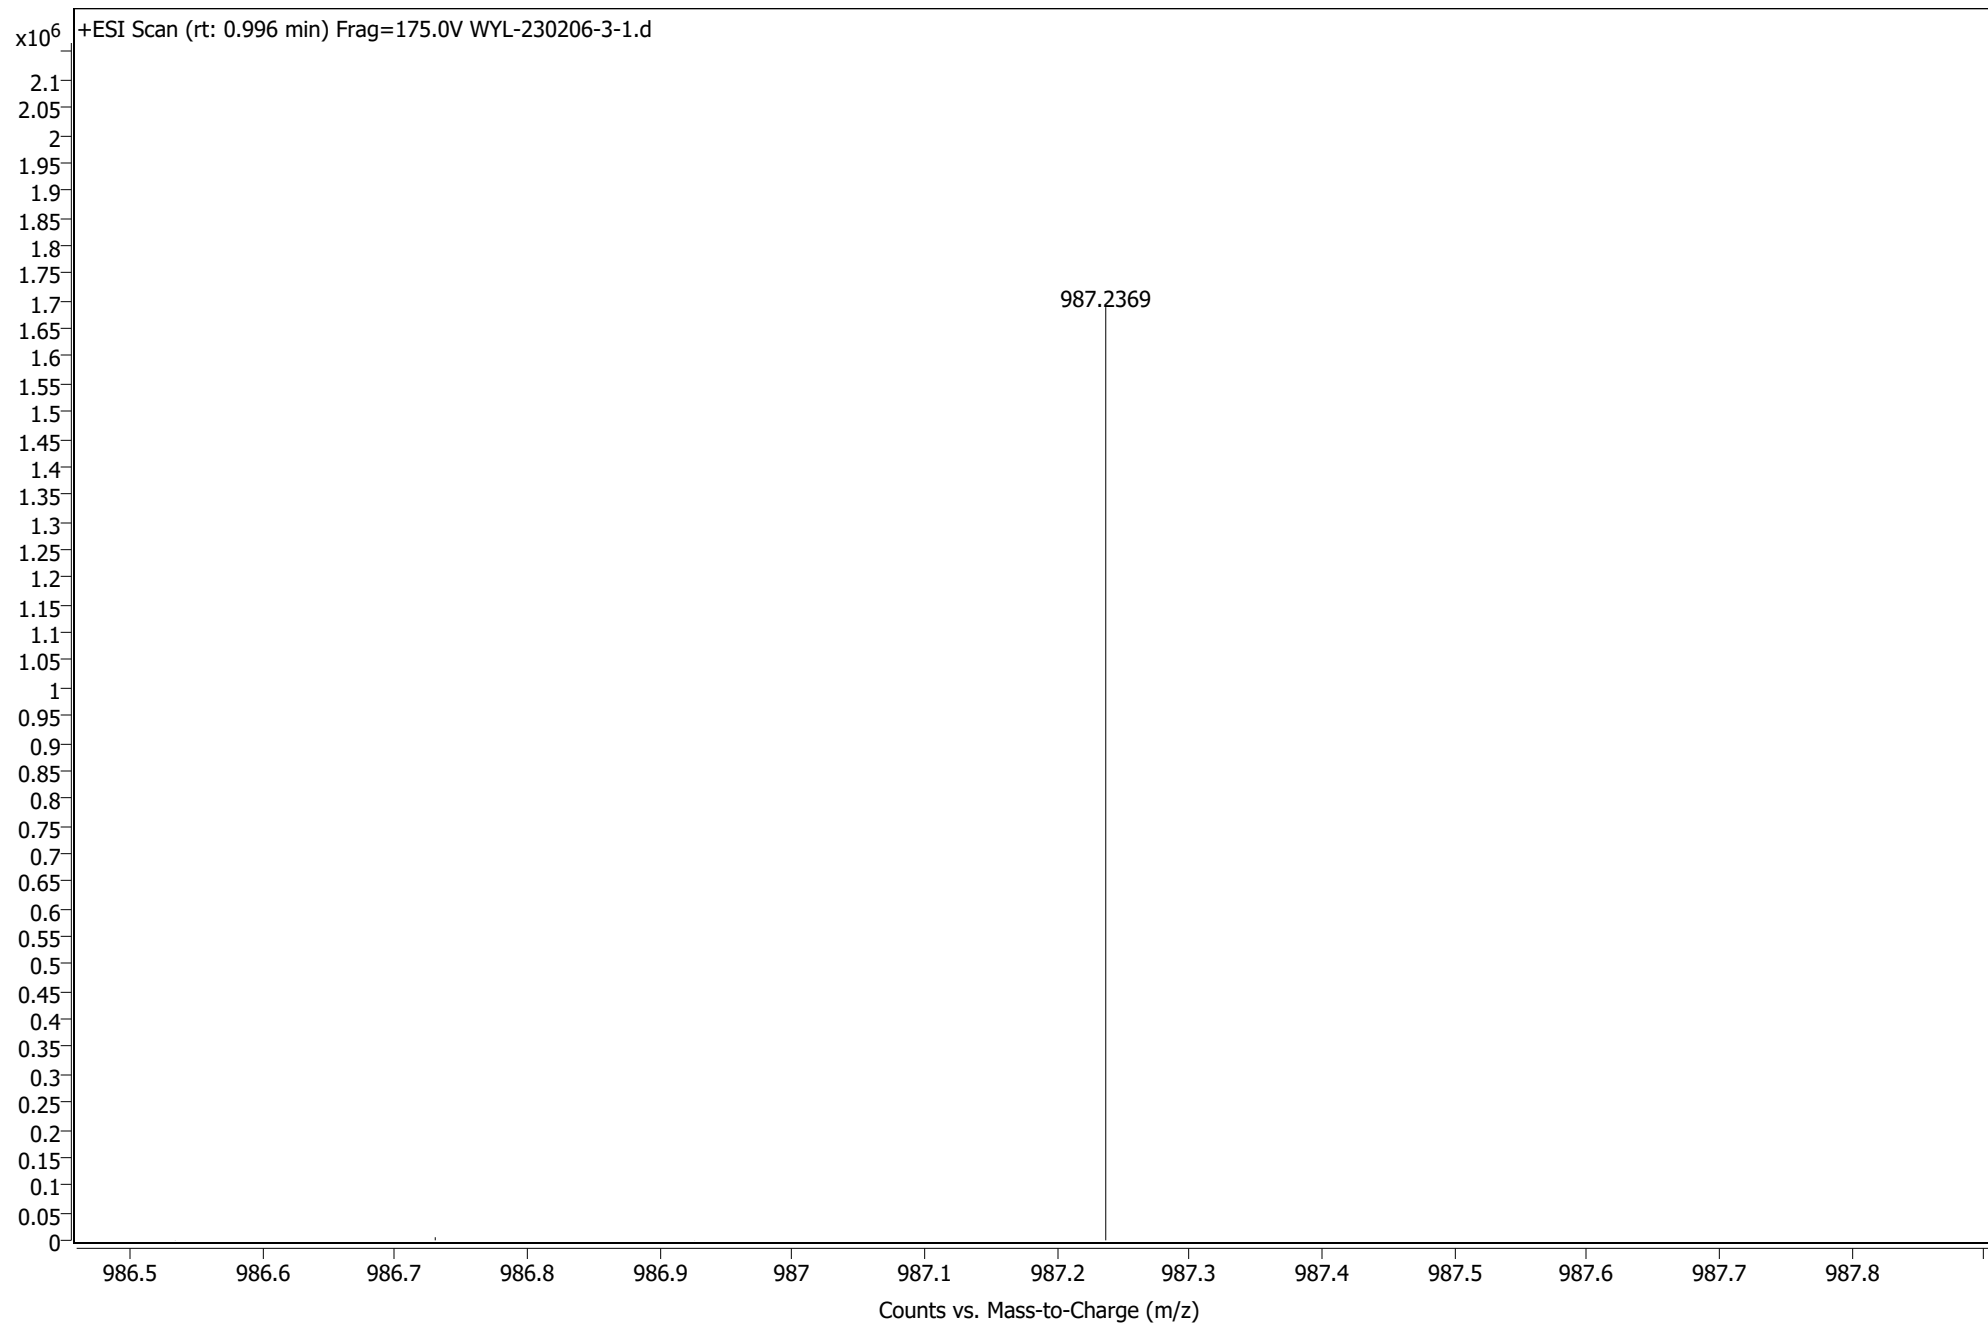

Supplement: d3cc01705b2.zip [file 3j_Graphic.pdf › MS/3j_Graphic.pdf]

# User Spectrum Plot Report

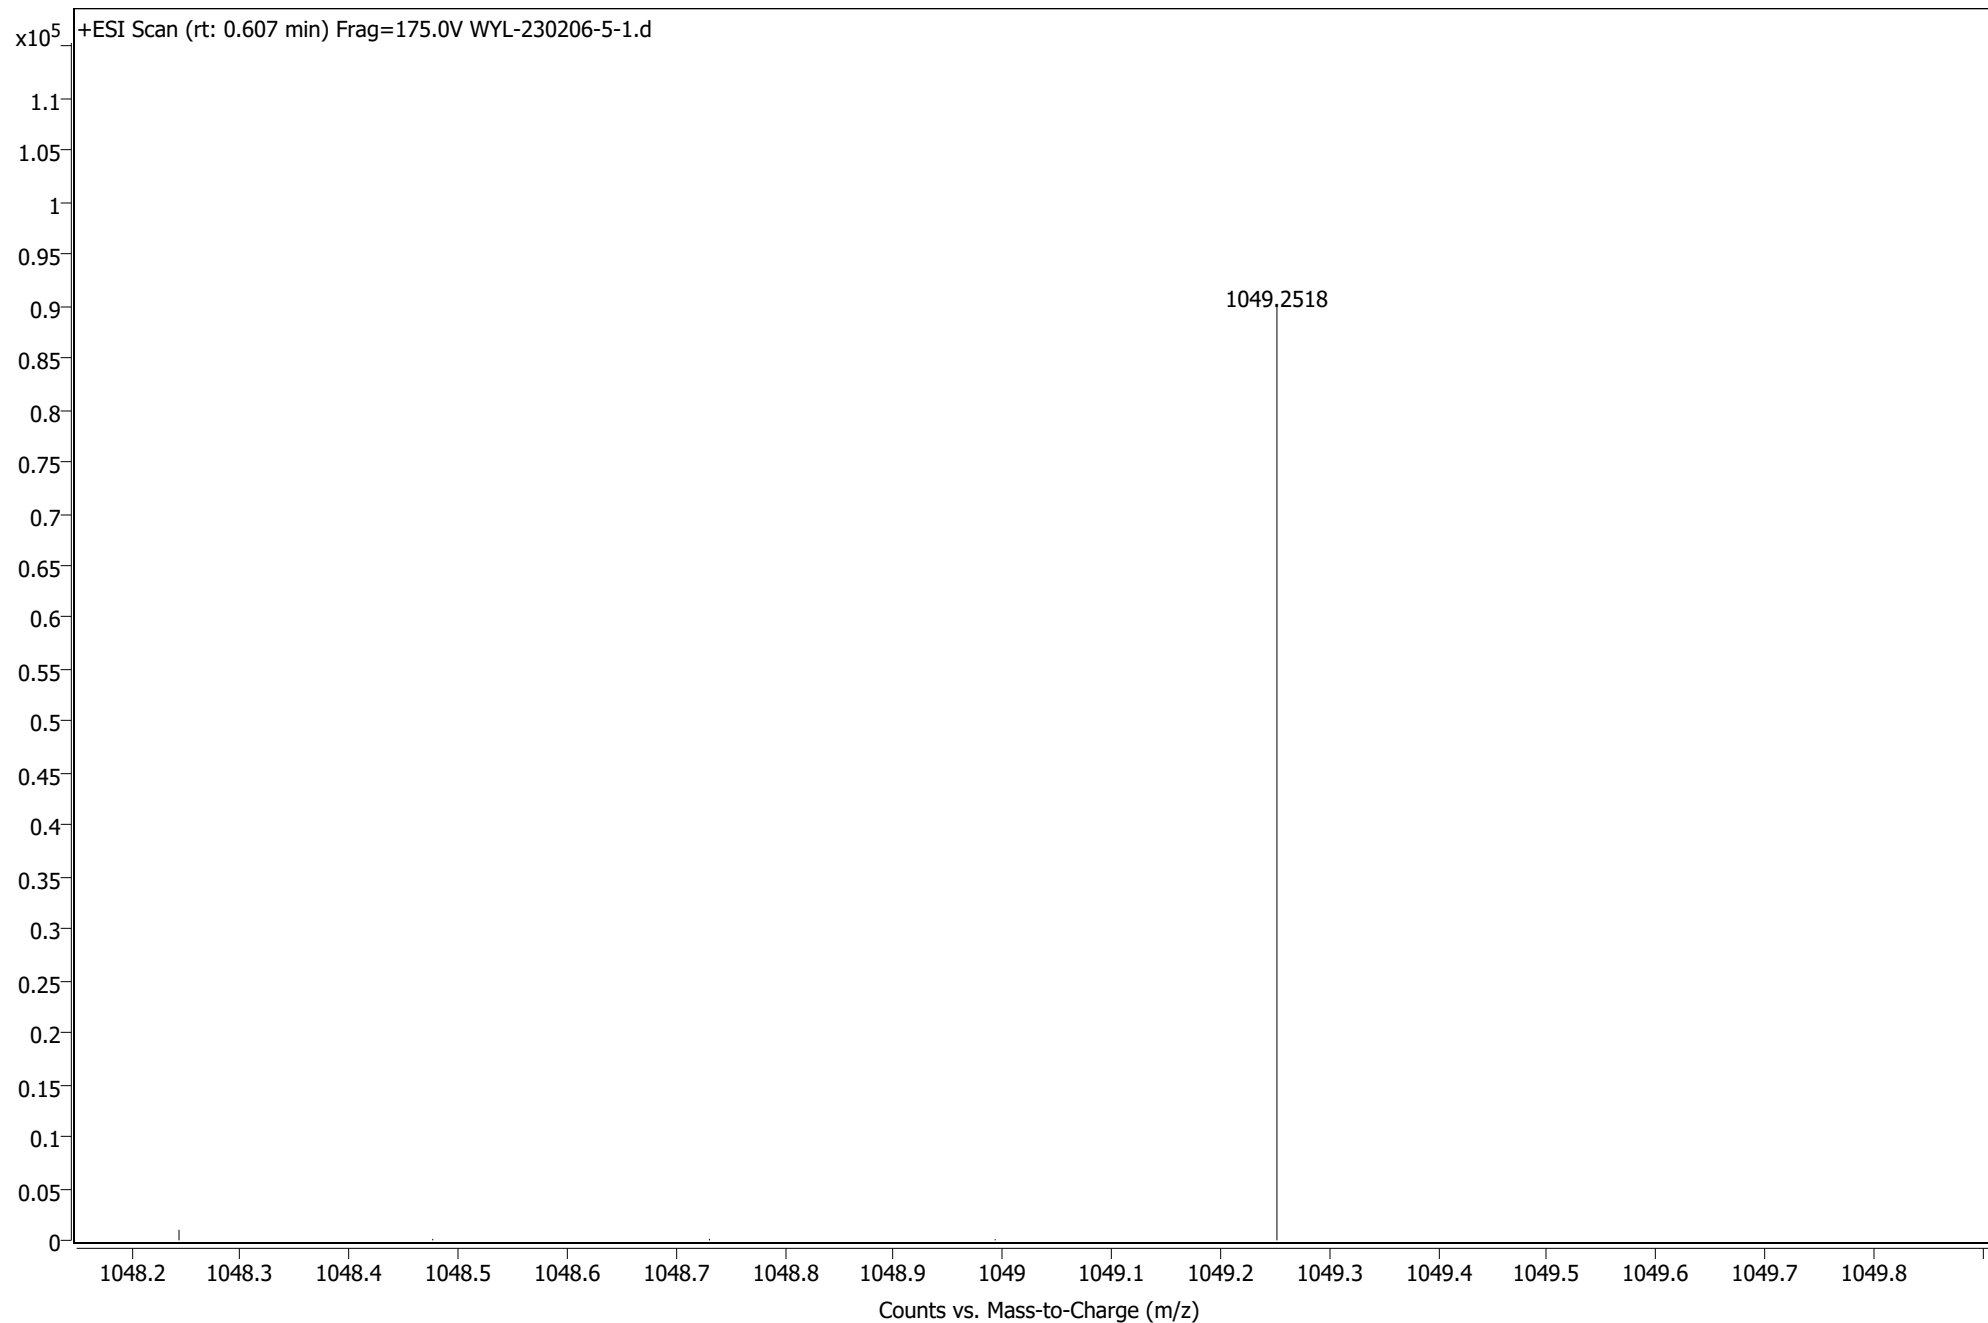

Supplement: d3cc01705b2.zip [file 3l_Graphic.pdf › MS/3l_Graphic.pdf]

# User Spectrum Plot Report

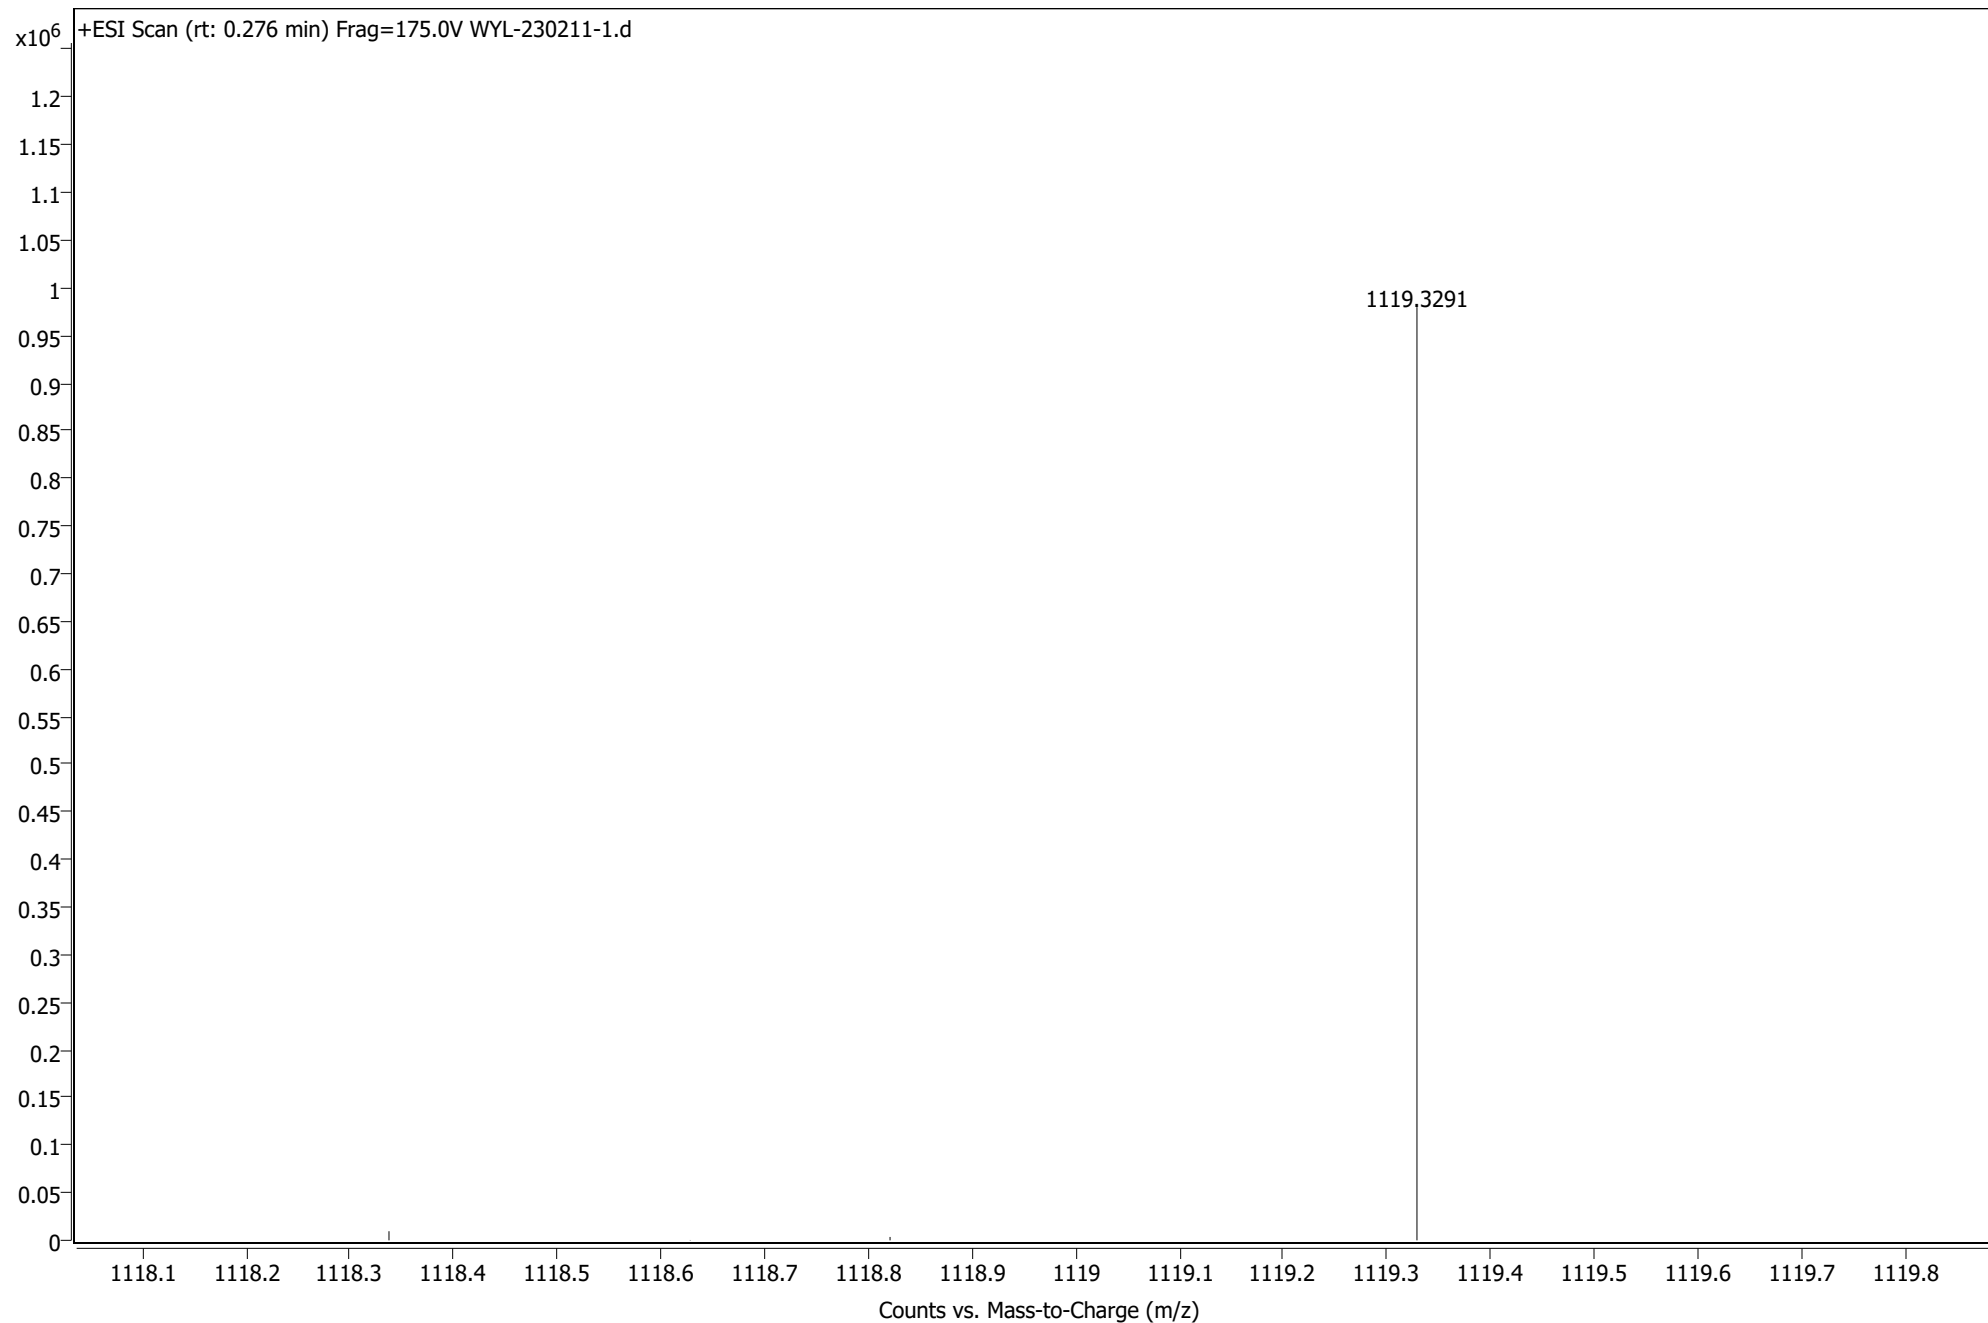

Supplement: d3cc01705b2.zip [file 3m_Graphic.pdf › MS/3m_Graphic.pdf]

# User Spectrum Plot Report

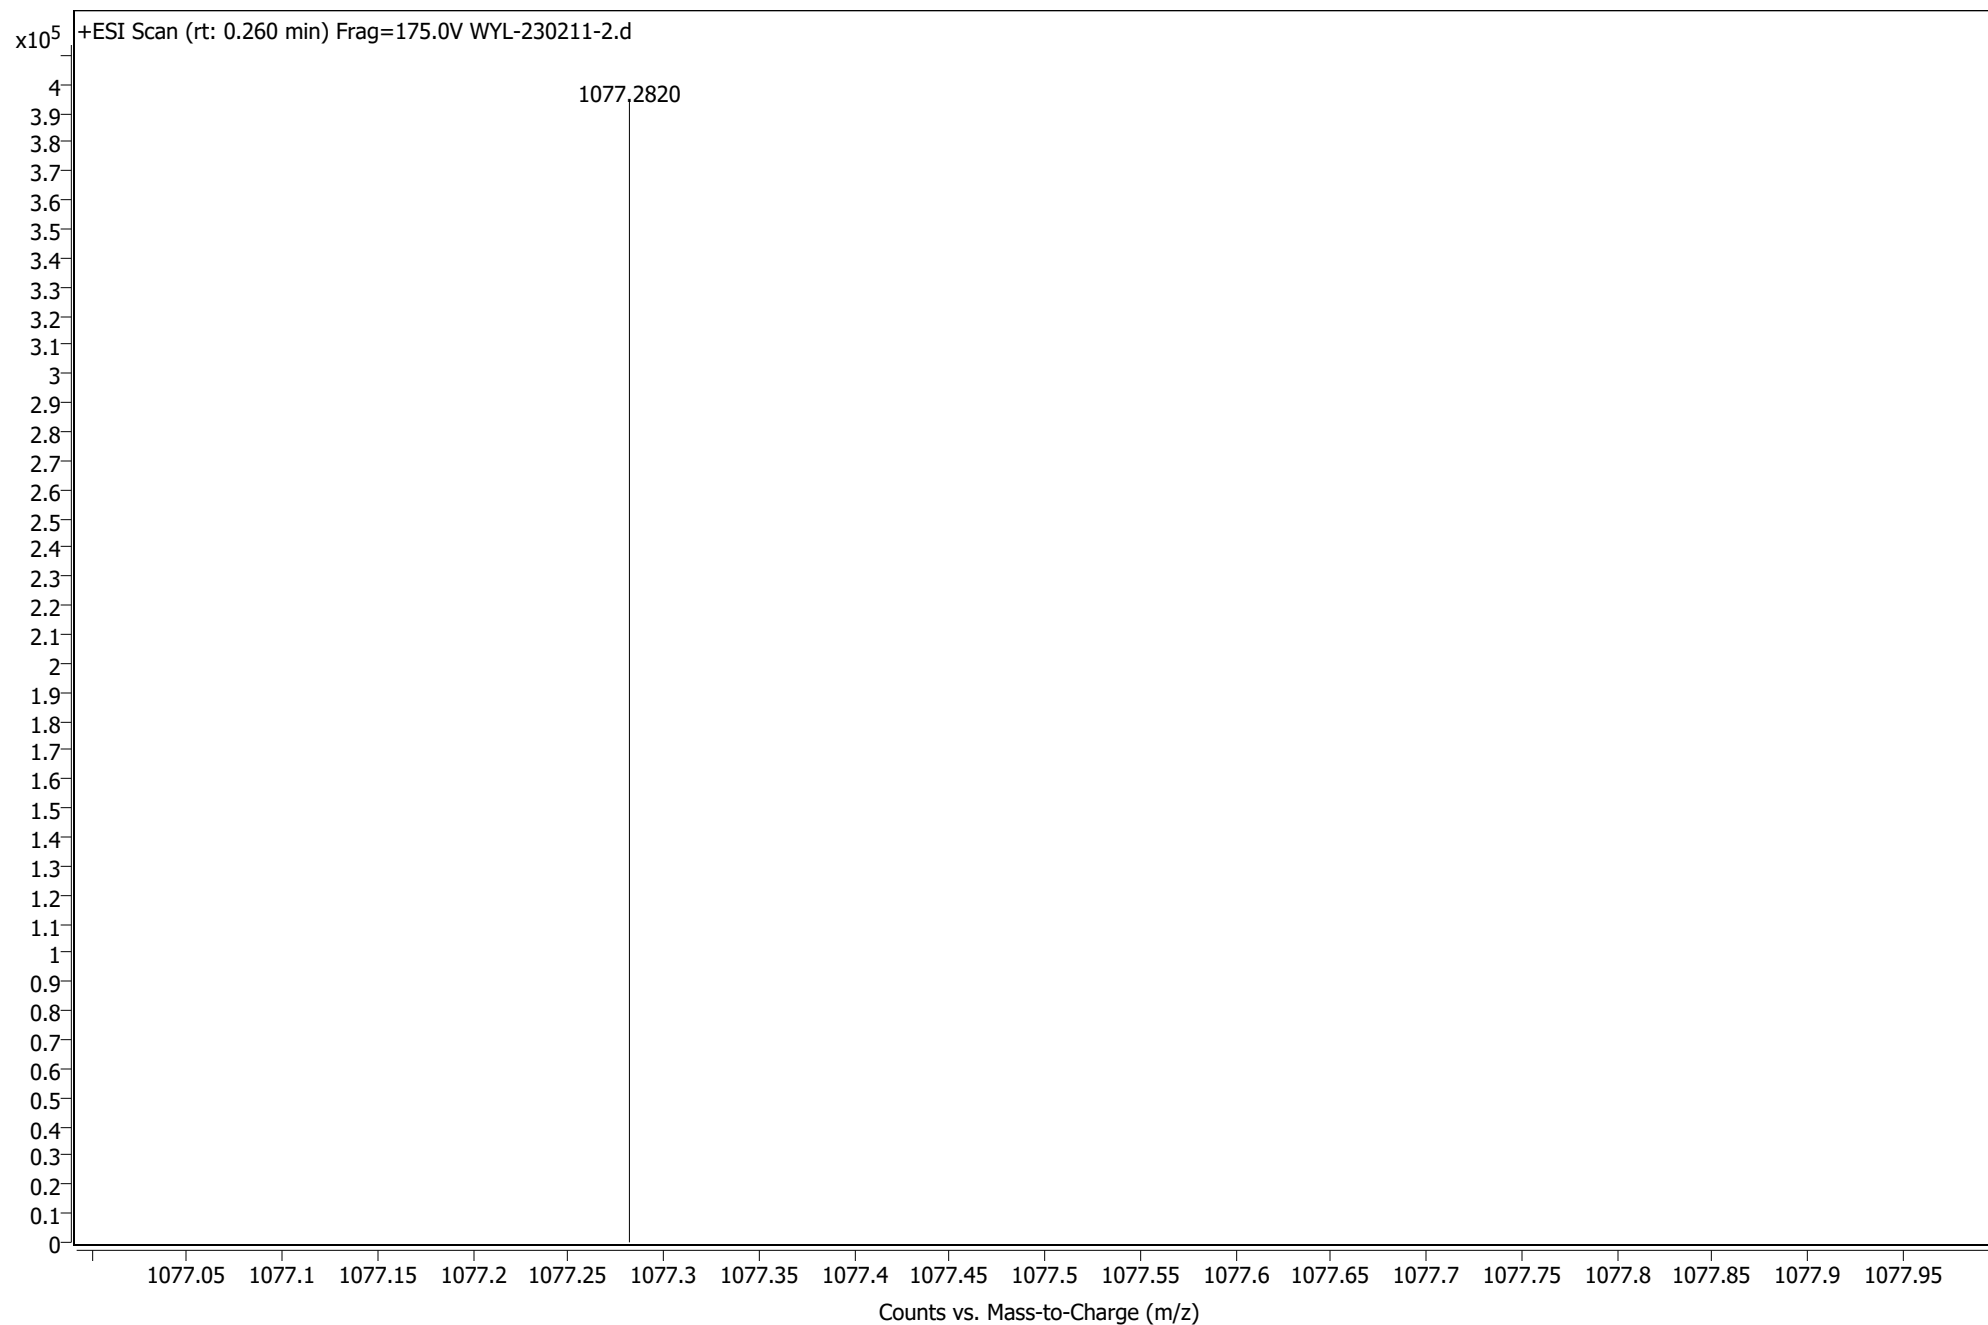

Supplement: d3cc01705b2.zip [file 3n_Graphic.pdf › MS/3n_Graphic.pdf]

# User Spectrum Plot Report

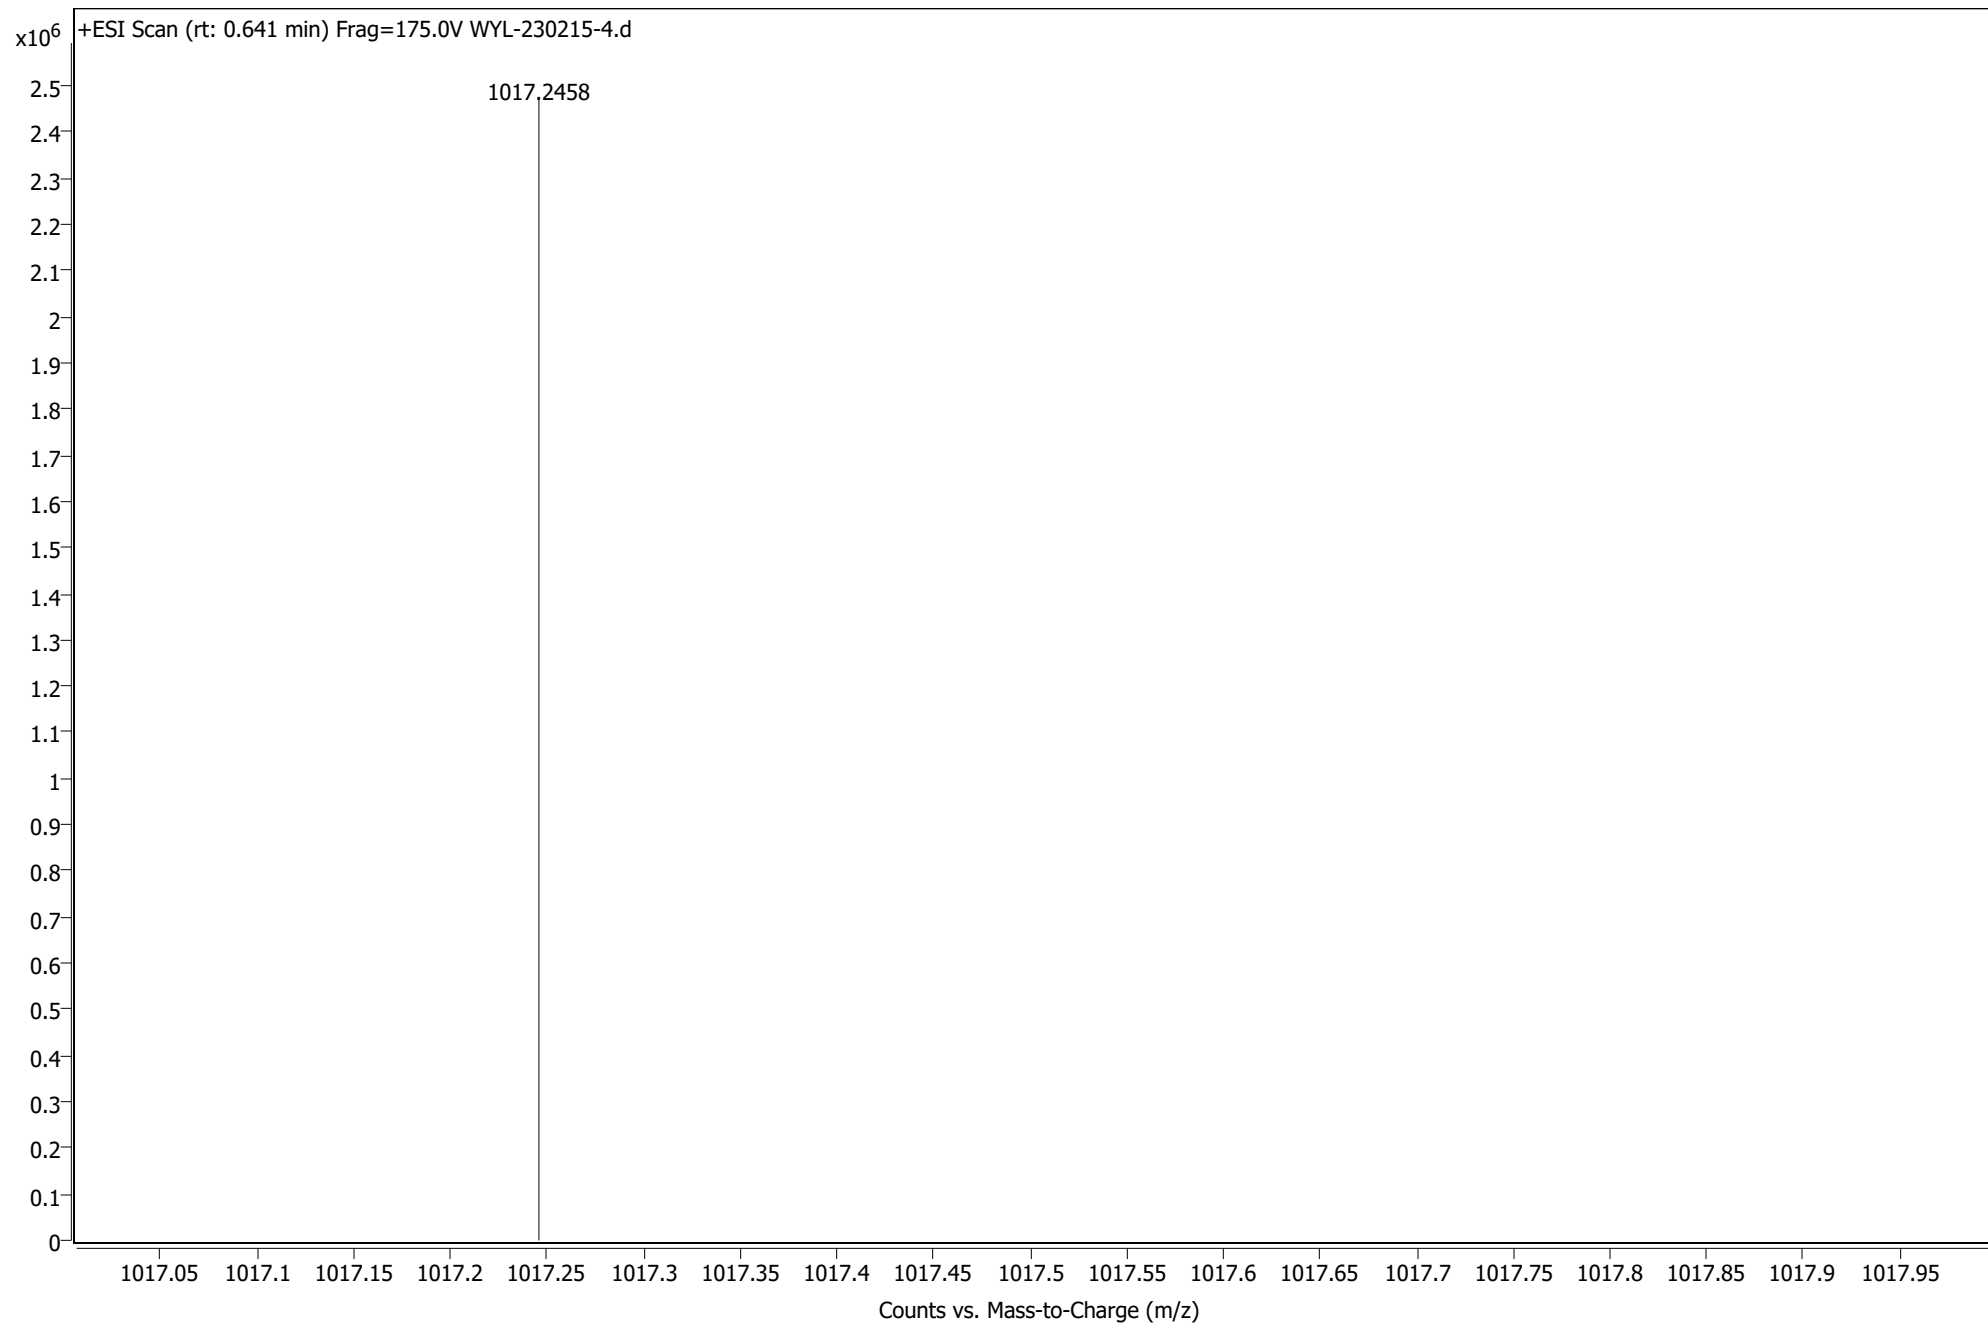

Supplement: d3cc01705b2.zip [file 3o_Graphic.pdf › MS/3o_Graphic.pdf]

# User Spectrum Plot Report

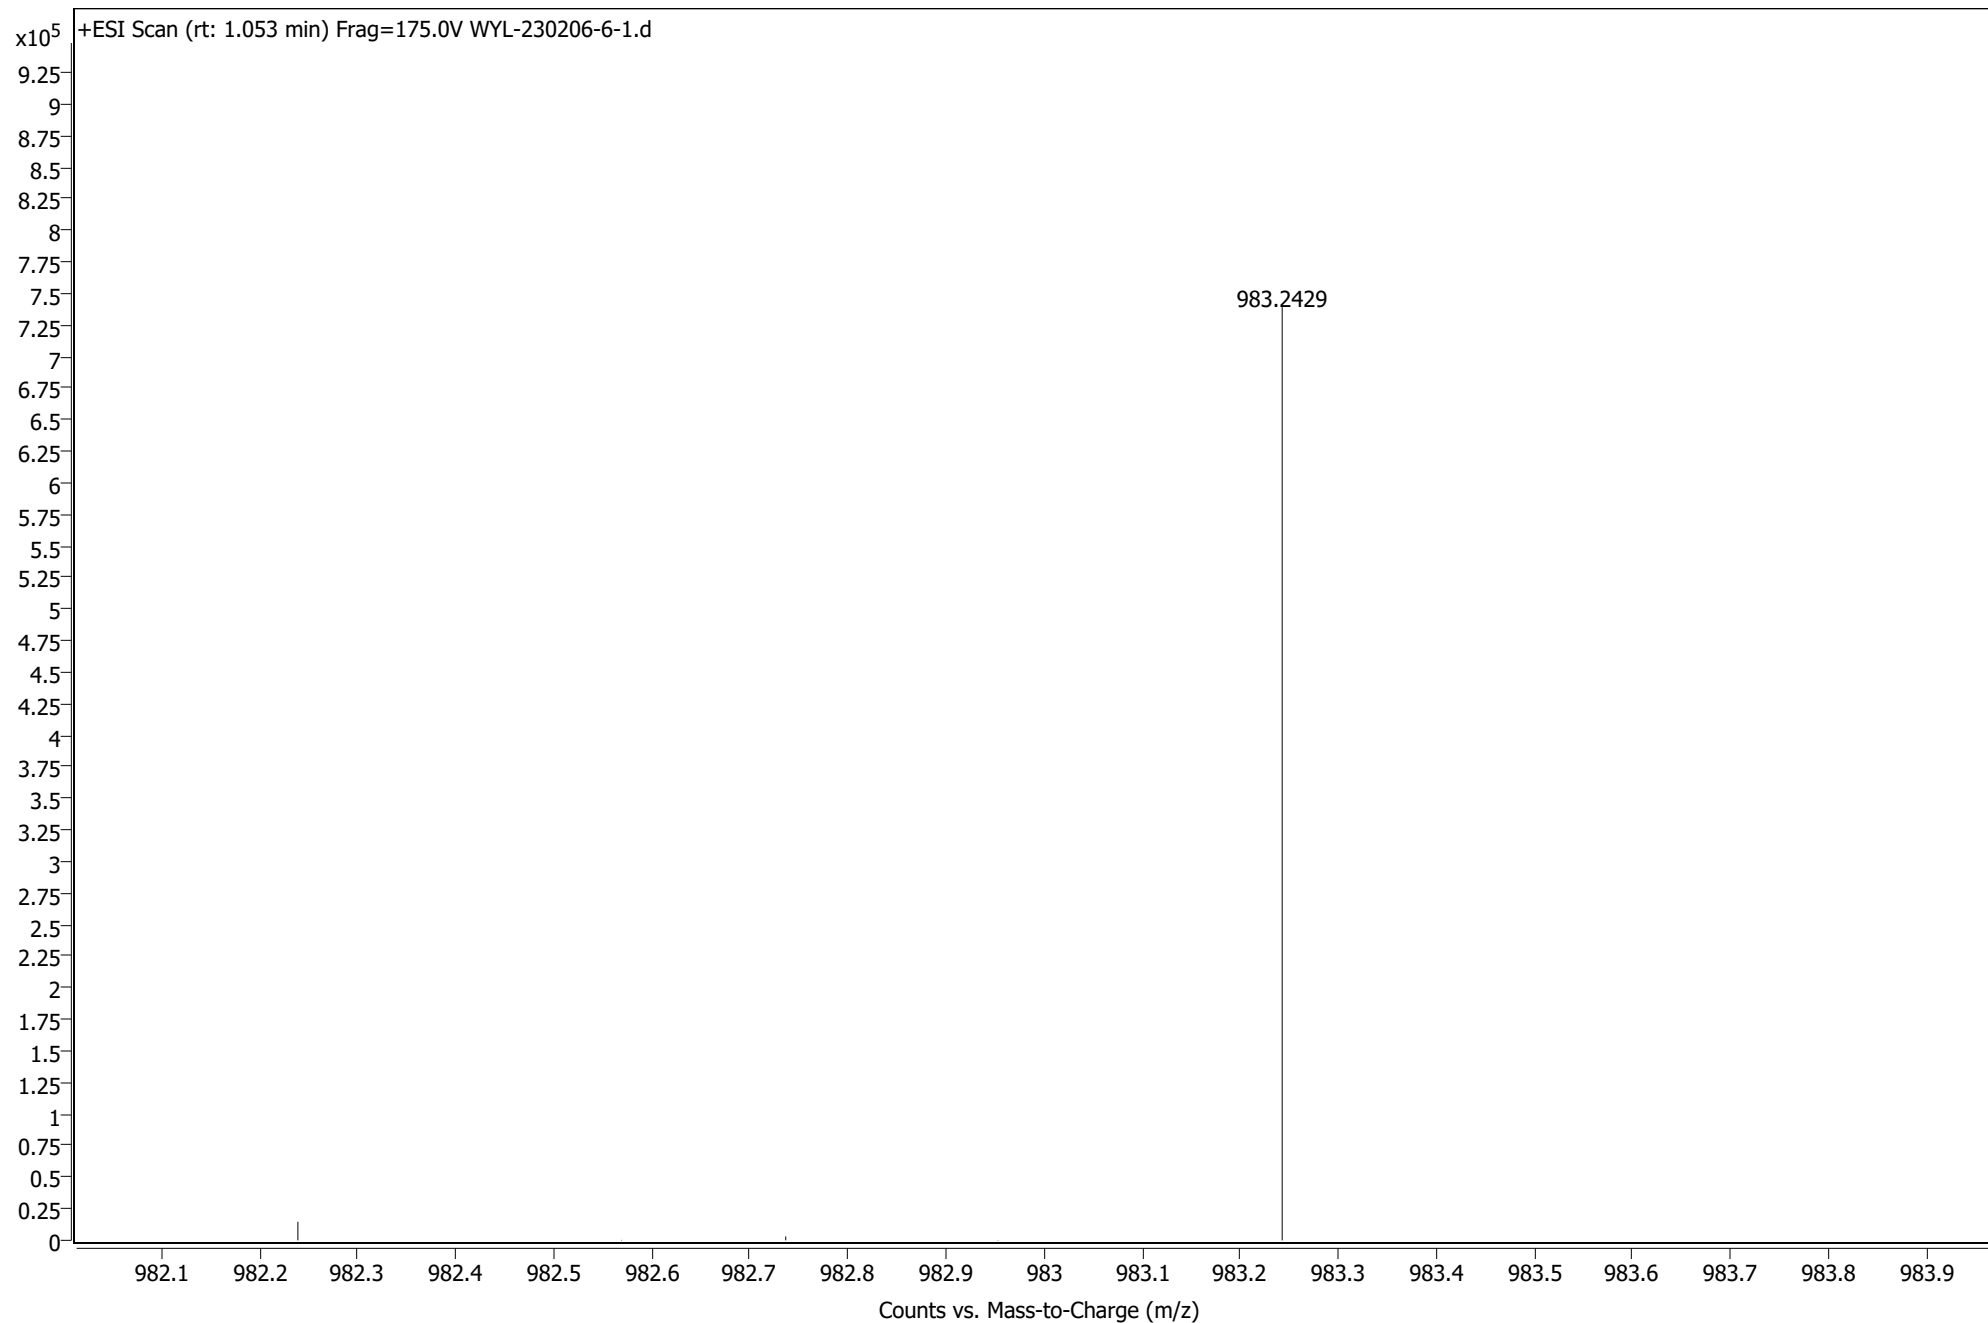

Supplement: d3cc01705b2.zip [file 3q_Graphic.pdf › MS/3q_Graphic.pdf]

# User Spectrum Plot Report

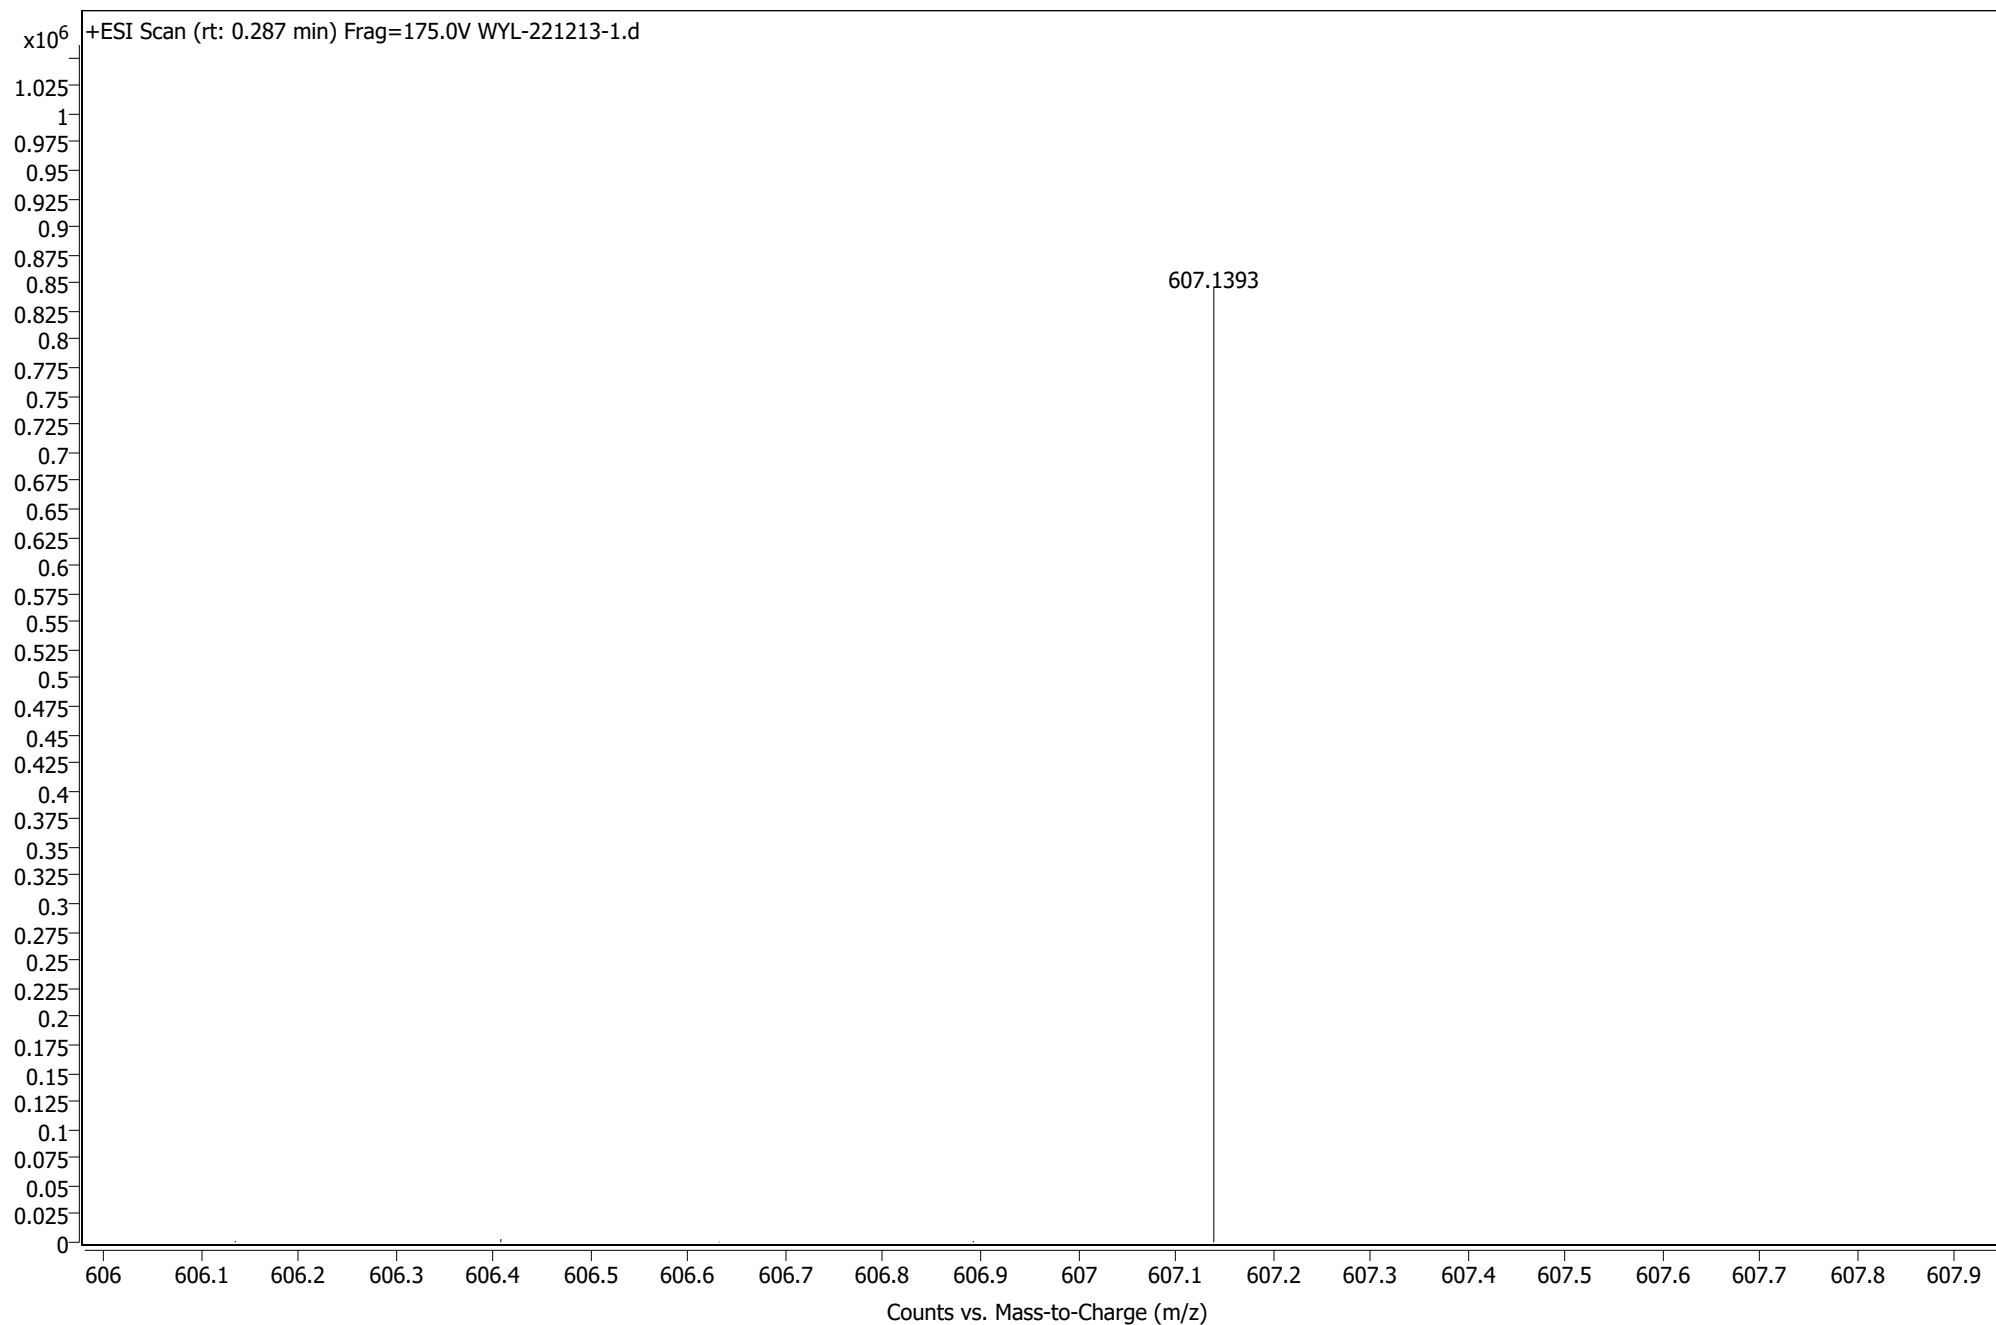

Supplement: d3cc01705b2.zip [file 4a_Graphic.pdf › MS/4a_Graphic.pdf]

# User Spectrum Plot Report

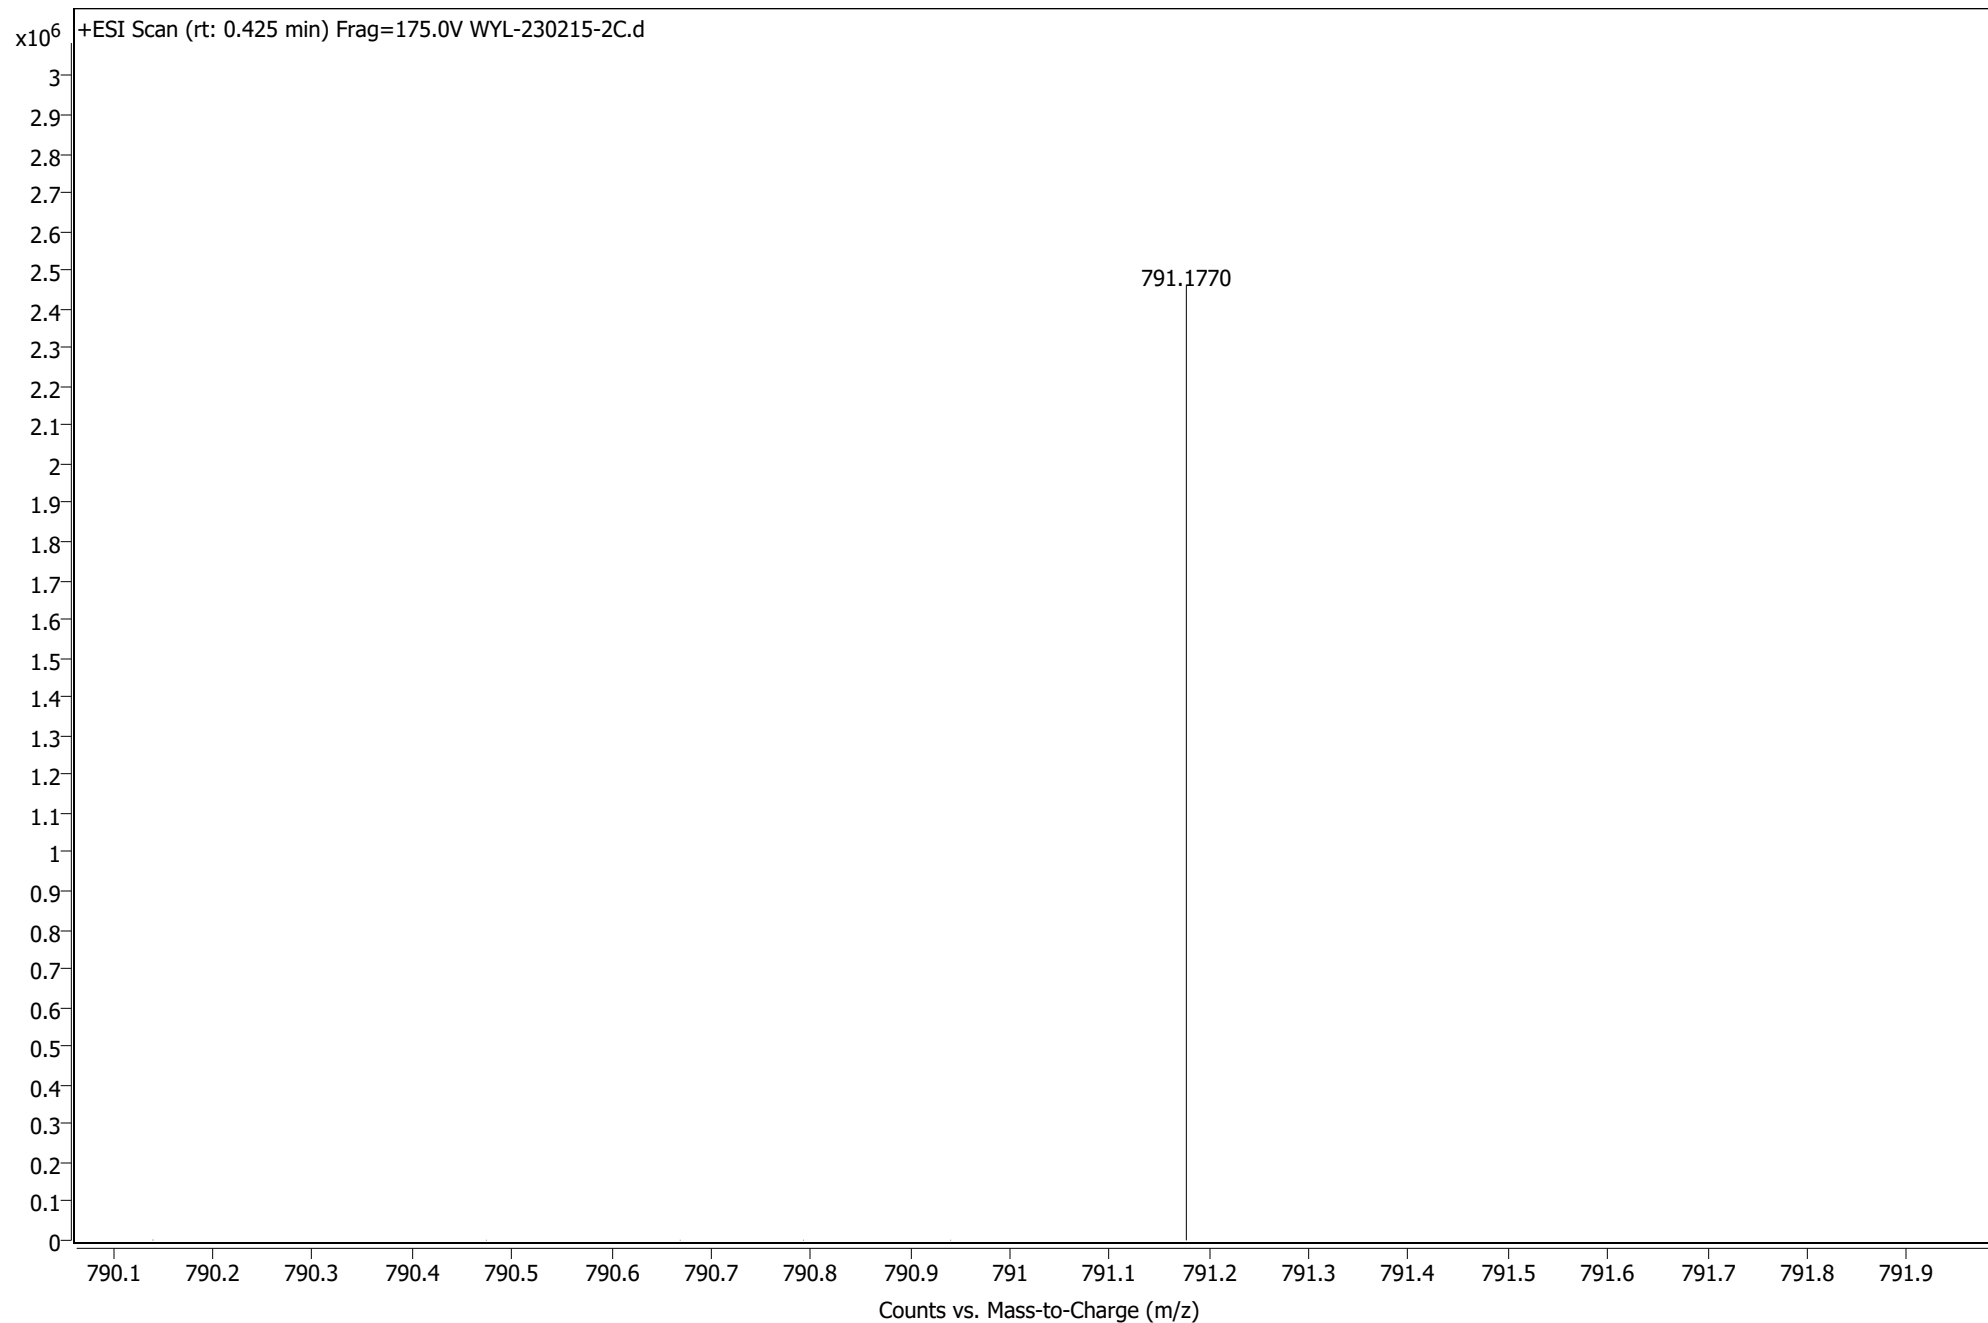

Supplement: d3cc01705b2.zip [file 4b_Graphic.pdf › MS/4b_Graphic.pdf]

# User Spectrum Plot Report

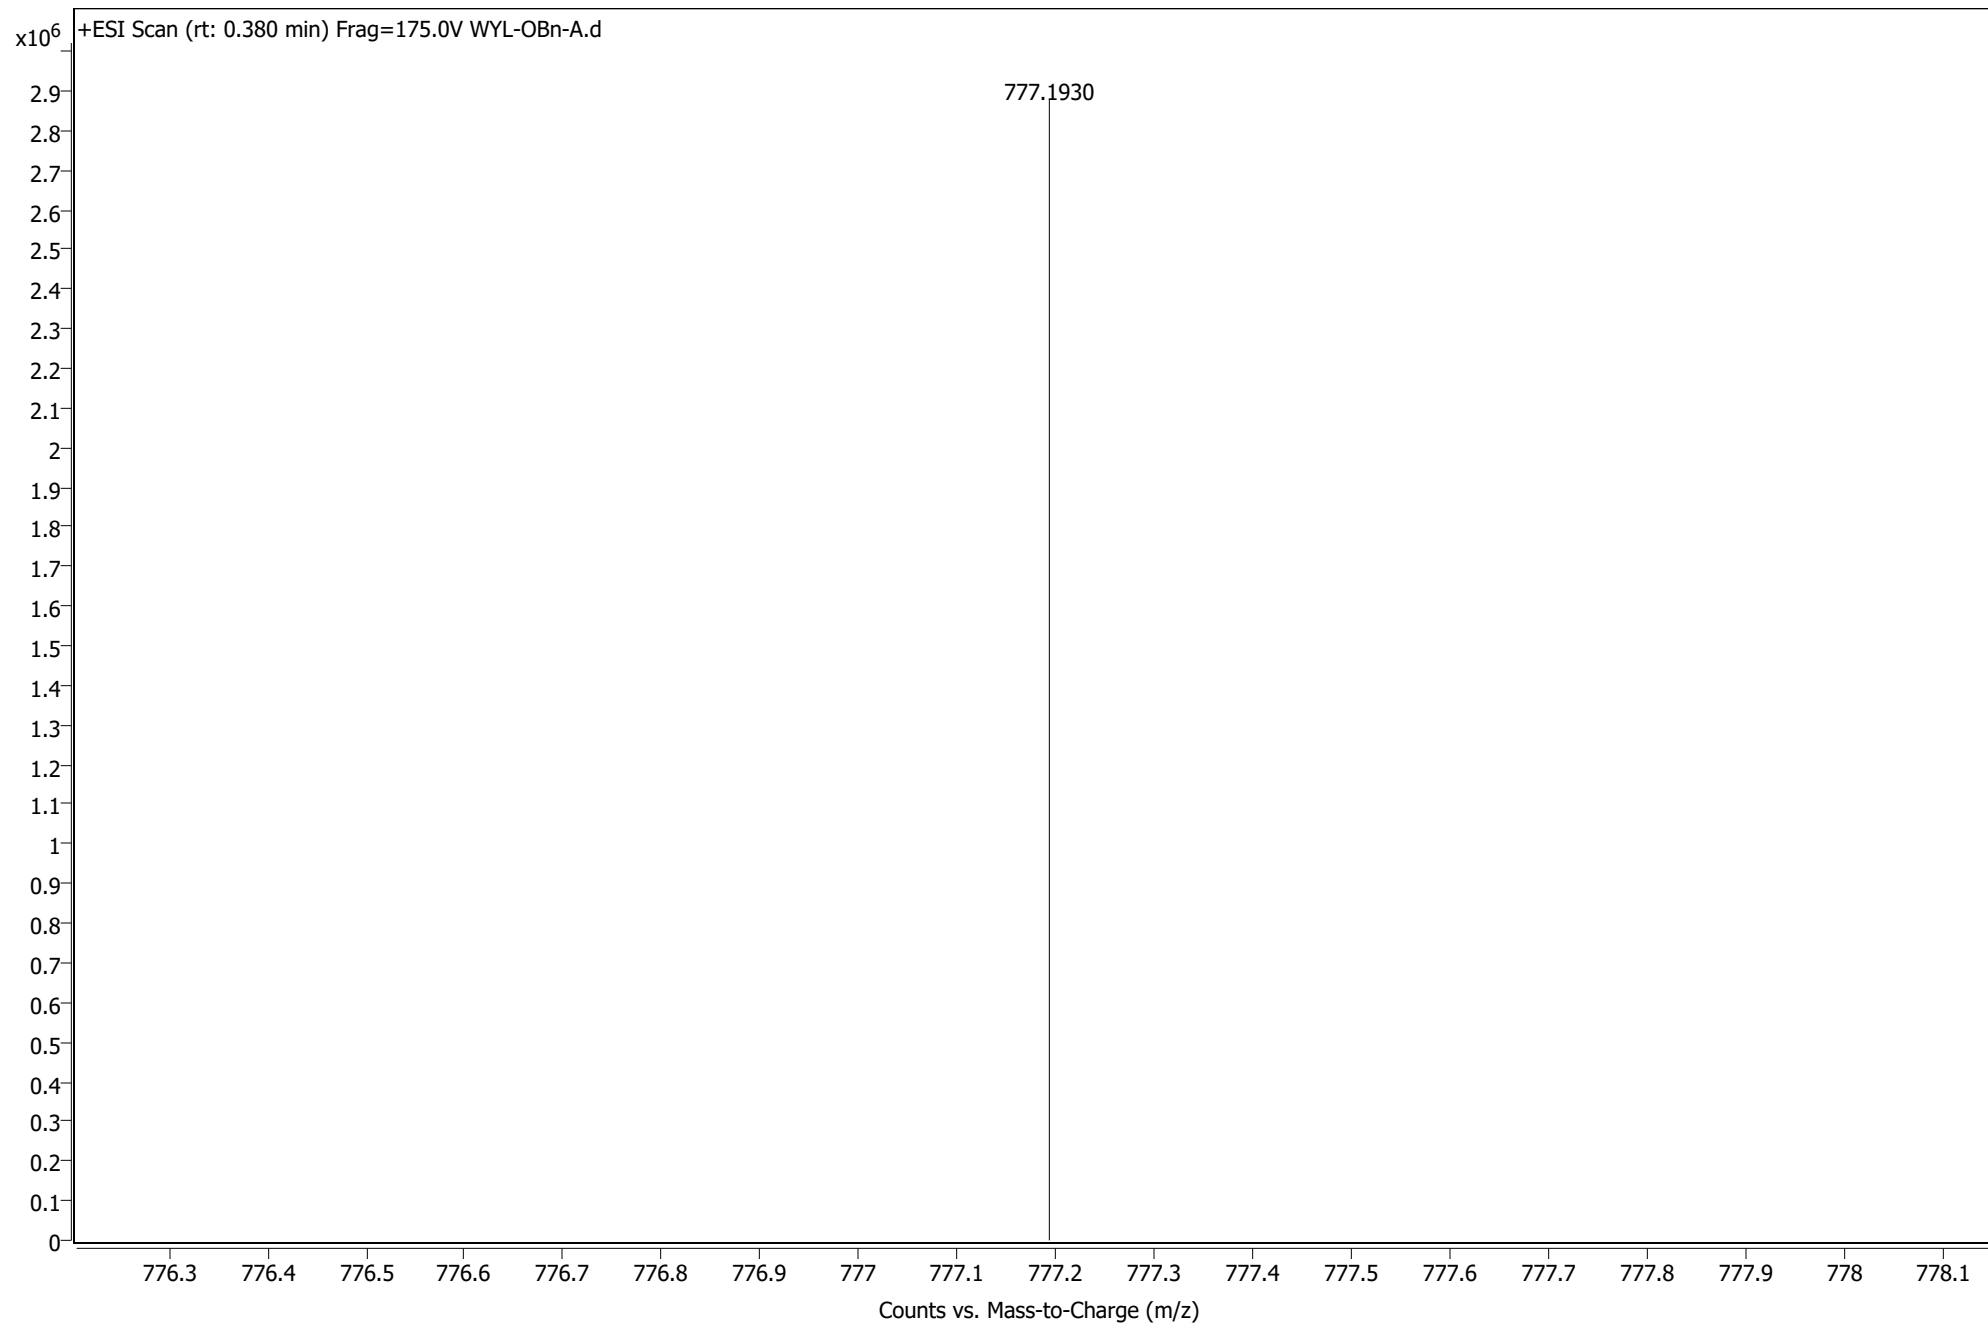

Supplement: d3cc01705b2.zip [file 5_Graphic.pdf › MS/5_Graphic.pdf]

# User Spectrum Plot Report

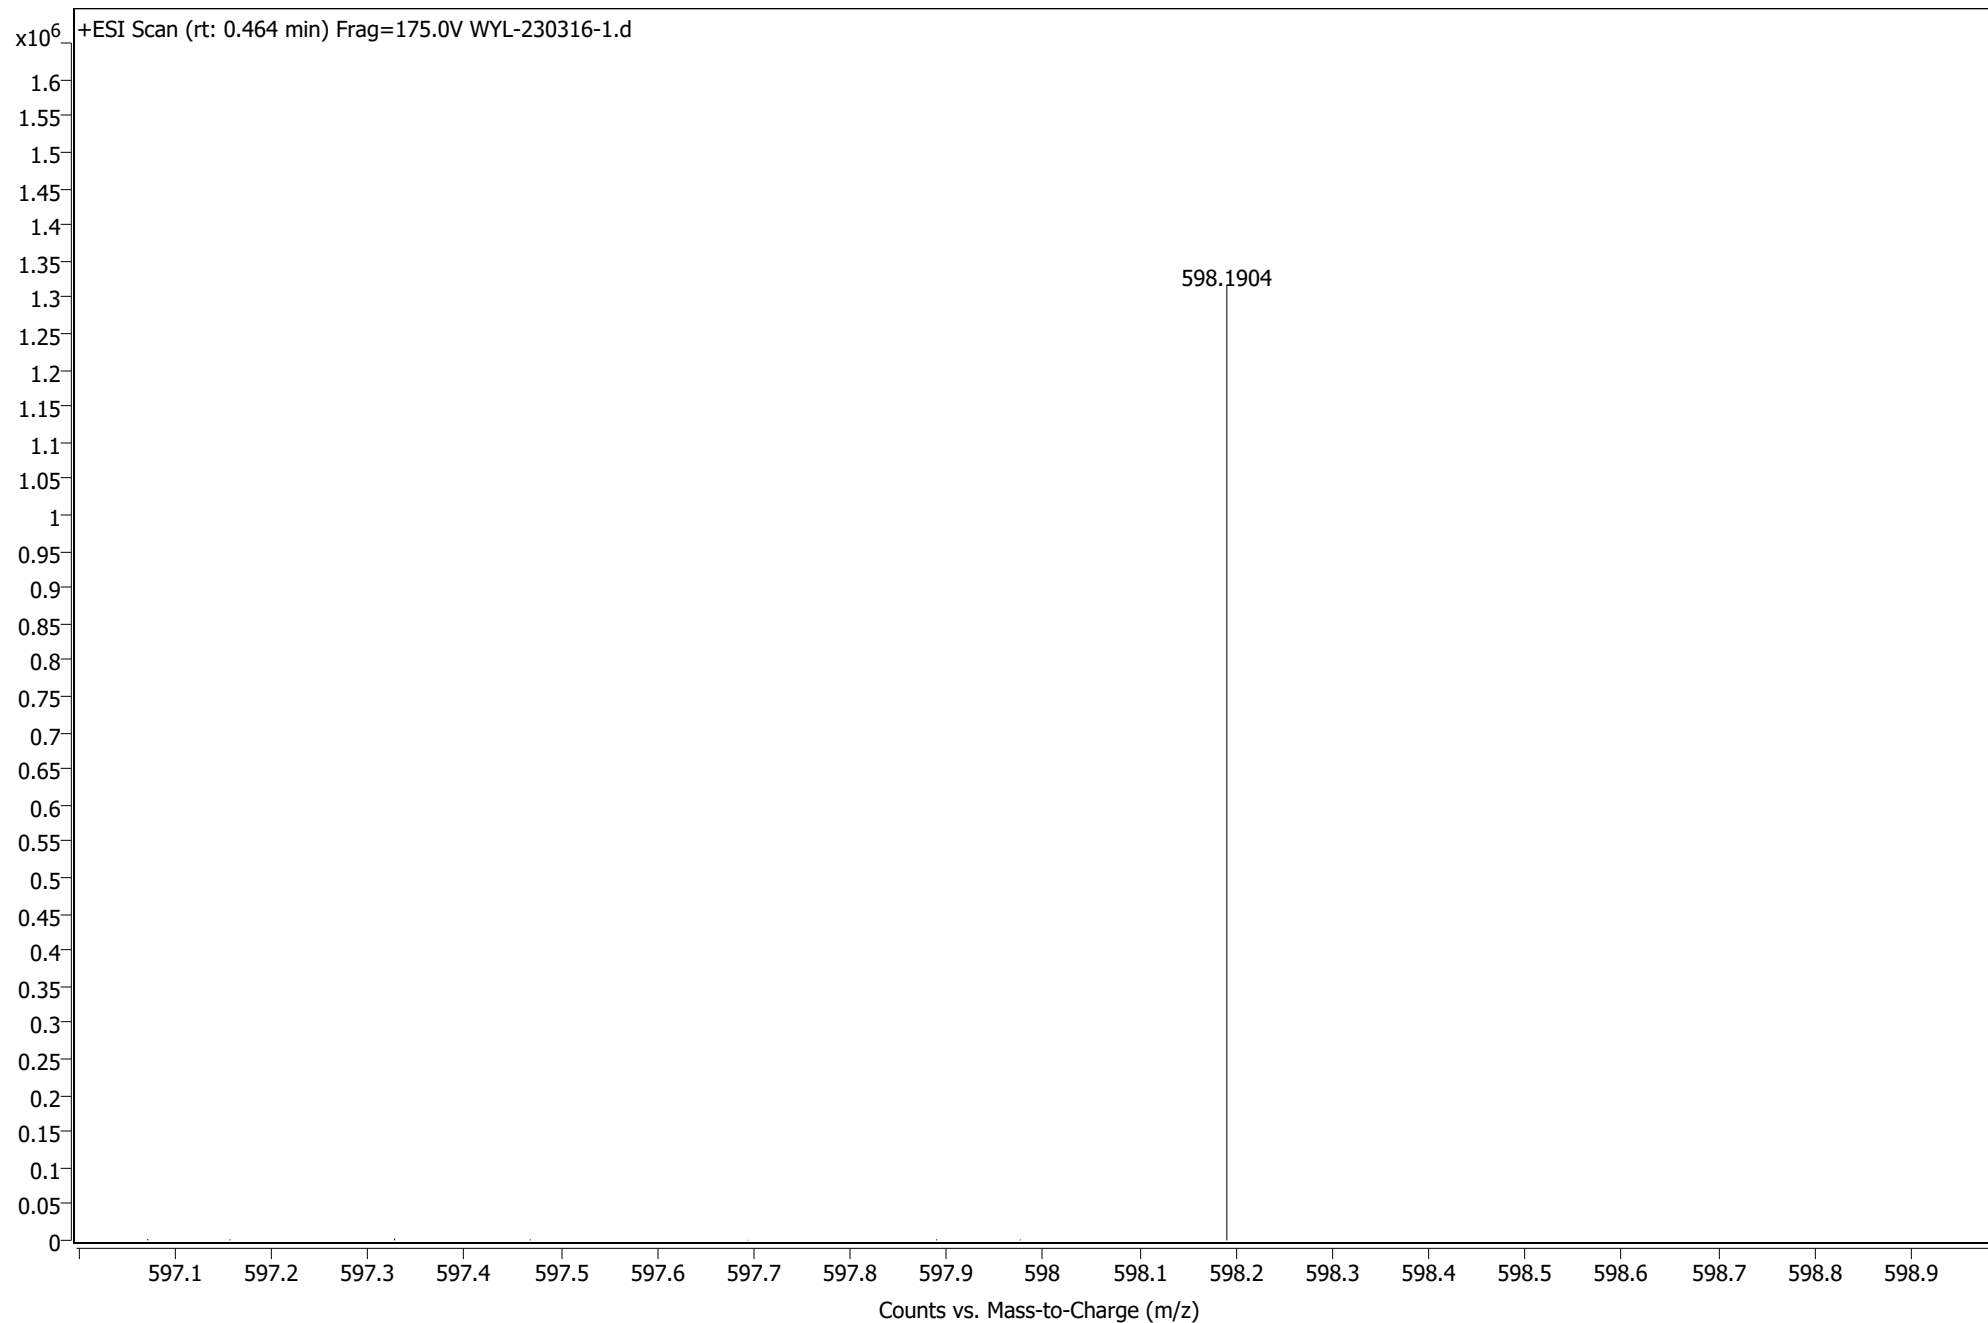

Supplement: d3cc01705b2.zip [file C5-Me.pdf › MS/C5-Me.pdf]
